# Supplementary material
Source: MDPI journal article supplement (https://www.mdpi.com/2409-515X/8/1/19)
Supplement: s1 [file s1]

### Centre 1

[illegible]

Cost

[illegible]

## Centre 2

## Number of contacts

[illegible]

Cost

[illegible]

### Centre 3

## Number of contacts

[illegible]

Cost

|                                       | Inherited metabolic disorders (IMD)                    |                                  |                           |                                |                       |                      | Hypothyroidism (CHT) | Sickle Cell Disorder (SCD) | Cystic Fibrosis (CF) |                |               |
|---------------------------------------|--------------------------------------------------------|----------------------------------|---------------------------|--------------------------------|-----------------------|----------------------|----------------------|----------------------------|----------------------|----------------|---------------|
|                                       | medium chain acyl CoA dehydrogenase deficiency (MCADD) | maple syrup urine disease (MSUD) | isovaleric aciduria (IVA) | glutaric aciduria type 1 (GA1) | phenylketonuria (PKU) | homocystinuria (HCU) |                      |                            |                      |                |               |
| Personnel - Clinical path items       |                                                        |                                  |                           |                                |                       |                      |                      | NBS+: Affected             | NBS+: Carrier        | NBS+: Affected | NBS+: Carrier |
| CNS - Clinical nurse specialist       |                                                        |                                  |                           |                                |                       |                      |                      |                            |                      |                |               |
| home visit                            | £104                                                   | £104                             | £104                      | £104                           | £104                  | £104                 | £104                 | £104                       | £0                   | £104           | £104          |
| surgery/hospital visit                | £65                                                    | £65                              | £65                       | £65                            | £65                   | £65                  | £65                  | £0                         | £0                   | £65            | £0            |
| not face-to-face external interaction | £54                                                    | £54                              | £54                       | £54                            | £54                   | £54                  | £27                  | £80                        | £0                   | £80            | £0            |
| not face-to-face internal interaction | £80                                                    | £80                              | £80                       | £80                            | £80                   | £80                  | £27                  | £54                        | £0                   | £54            | £54           |
| Health visitor/midwife                |                                                        |                                  |                           |                                |                       |                      |                      |                            |                      |                |               |
| home visit                            | £0                                                     | £0                               | £0                        | £0                             | £0                    | £0                   | £0                   | £0                         | £104                 | £0             | £0            |
| surgery/hospital visit                | £0                                                     | £0                               | £0                        | £0                             | £0                    | £0                   | £0                   | £0                         | £0                   | £0             | £0            |
| not face-to-face external interaction | £0                                                     | £0                               | £0                        | £0                             | £0                    | £0                   | £0                   | £0                         | £54                  | £0             | £0            |
| not face-to-face internal interaction | £0                                                     | £0                               | £0                        | £0                             | £0                    | £0                   | £27                  | £27                        | £80                  | £0             | £27           |
| Consumables                           |                                                        |                                  |                           |                                |                       |                      |                      |                            |                      |                |               |
| Leaflet                               | £0                                                     | £0                               | £0                        | £0                             | £0                    | £0                   | £0                   | £0                         | £0                   | £0             | £0            |
| GP                                    |                                                        |                                  |                           |                                |                       |                      |                      |                            |                      |                |               |
| home visit                            | £0                                                     | £0                               | £0                        | £0                             | £0                    | £0                   | £0                   | £0                         | £0                   | £0             | £0            |
| surgery/hospital visit                | £0                                                     | £0                               | £0                        | £0                             | £0                    | £0                   | £0                   | £0                         | £0                   | £0             | £0            |
| not face-to-face external interaction | £0                                                     | £0                               | £0                        | £0                             | £0                    | £0                   | £0                   | £0                         | £0                   | £0             | £0            |
| not face-to-face internal interaction | £0                                                     | £0                               | £0                        | £0                             | £0                    | £0                   | £87                  | £87                        | £87                  | £87            | £87           |
| Consultant (hospital based)           |                                                        |                                  |                           |                                |                       |                      |                      |                            |                      |                |               |
| home visit                            | £0                                                     | £0                               | £0                        | £0                             | £0                    | £0                   | £0                   | £0                         | £0                   | £0             | £0            |
| surgery/hospital visit                | £90                                                    | £90                              | £90                       | £90                            | £90                   | £90                  | £90                  | £90                        | £0                   | £90            | £0            |
| not face-to-face external interaction | £0                                                     | £0                               | £0                        | £0                             | £0                    | £0                   | £37                  | £0                         | £0                   | £0             | £0            |
| not face-to-face internal interaction | £75                                                    | £75                              | £75                       | £75                            | £75                   | £75                  | £75                  | £75                        | £0                   | £75            | £0            |

## Centre 4

### Number of contacts

|                                        | Inherited metabolic disorders (IMD)                    |                                  |                           |                                |                       |                      | Hypothyroidism (CHT) | Sickle Cell Disorder (SCD) |               | Cystic Fibrosis (CF) |               |
|----------------------------------------|--------------------------------------------------------|----------------------------------|---------------------------|--------------------------------|-----------------------|----------------------|----------------------|----------------------------|---------------|----------------------|---------------|
|                                        | medium chain acyl CoA dehydrogenase deficiency (MCADD) | maple syrup urine disease (MSUD) | isovaleric aciduria (IVA) | glutaric aciduria type 1 (GA1) | phenylketonuria (PKU) | homocystinuria (HCU) |                      | NBS+: Affected             | NBS+: Carrier | NBS+: Affected       | NBS+: Carrier |
| <b>Personnel - Clinical path items</b> |                                                        |                                  |                           |                                |                       |                      |                      |                            |               |                      |               |
| CNS - Clinical nurse specialist        |                                                        |                                  |                           |                                |                       |                      |                      |                            |               |                      |               |
| home visit                             | 1                                                      | 1                                | 1                         | 1                              | 1                     | 1                    | 1                    | 1                          | 1             | 0                    | 1             |
| surgery/hospital visit                 | 1                                                      | 1                                | 1                         | 1                              | 1                     | 1                    | 1                    | 1                          | 0             | 0                    | 0             |
| not face-to-face external interaction  | 2                                                      | 2                                | 2                         | 2                              | 2                     | 2                    | 1                    | 2                          | 1             | 0                    | 2             |
| not face-to-face internal interaction  | 3                                                      | 3                                | 3                         | 3                              | 3                     | 3                    | 1                    | 2                          | 0             | 0                    | 2             |
| Health visitor/midwife                 |                                                        |                                  |                           |                                |                       |                      |                      |                            |               |                      |               |
| home visit                             | 0                                                      | 0                                | 0                         | 0                              | 0                     | 0                    | 0                    | 0                          | 0             | 0                    | 0             |
| surgery/hospital visit                 | 0                                                      | 0                                | 0                         | 0                              | 0                     | 0                    | 0                    | 0                          | 0             | 0                    | 0             |
| not face-to-face external interaction  | 0                                                      | 0                                | 0                         | 0                              | 0                     | 0                    | 0                    | 0                          | 0             | 0                    | 0             |
| not face-to-face internal interaction  | 0                                                      | 0                                | 0                         | 0                              | 0                     | 0                    | 0                    | 1                          | 0             | 0                    | 0             |
| Consumables                            |                                                        |                                  |                           |                                |                       |                      |                      |                            |               |                      |               |
| Leaflet                                |                                                        |                                  |                           |                                |                       |                      |                      |                            |               |                      |               |
| GP                                     |                                                        |                                  |                           |                                |                       |                      |                      |                            |               |                      |               |
| home visit                             | 0                                                      | 0                                | 0                         | 0                              | 0                     | 0                    | 0                    | 0                          | 0             | 0                    | 0             |
| surgery/hospital visit                 | 0                                                      | 0                                | 0                         | 0                              | 0                     | 0                    | 0                    | 0                          | 0             | 0                    | 0             |
| not face-to-face external interaction  | 0                                                      | 0                                | 0                         | 0                              | 0                     | 0                    | 0                    | 0                          | 1             | 0                    | 0             |
| not face-to-face internal interaction  | 0                                                      | 0                                | 0                         | 0                              | 0                     | 0                    | 1                    | 1                          | 1             | 0                    | 1             |
| Consultant (hospital based)            |                                                        |                                  |                           |                                |                       |                      |                      |                            |               |                      |               |
| home visit                             | 0                                                      | 0                                | 0                         | 0                              | 0                     | 0                    | 0                    | 0                          | 0             | 0                    | 0             |
| surgery/hospital visit                 | 1                                                      | 1                                | 1                         | 1                              | 1                     | 1                    | 1                    | 1                          | 0             | 0                    | 0             |
| not face-to-face external interaction  | 0                                                      | 0                                | 0                         | 0                              | 0                     | 0                    | 2                    | 0                          | 0             | 0                    | 0             |
| not face-to-face internal interaction  | 2                                                      | 2                                | 2                         | 2                              | 2                     | 2                    | 3                    | 1                          | 1             | 0                    | 0             |

Cost

|                                        | Inherited metabolic disorders (IMD)                    |                                  |                           |                                |                       |                      | Hypothyroidism (CHT) | Sickle Cell Disorder (SCD) |               | Cystic Fibrosis (CF) |               |
|----------------------------------------|--------------------------------------------------------|----------------------------------|---------------------------|--------------------------------|-----------------------|----------------------|----------------------|----------------------------|---------------|----------------------|---------------|
|                                        | medium chain acyl CoA dehydrogenase deficiency (MCADD) | maple syrup urine disease (MSUD) | isovaleric aciduria (IVA) | glutaric aciduria type 1 (GA1) | phenylketonuria (PKU) | homocystinuria (HCU) |                      | NBS+: Affected             | NBS+: Carrier | NBS+: Affected       | NBS+: Carrier |
| <b>Personnel - Clinical path items</b> |                                                        |                                  |                           |                                |                       |                      |                      |                            |               |                      |               |
| CNS - Clinical nurse specialist        |                                                        |                                  |                           |                                |                       |                      |                      |                            |               |                      |               |
| home visit                             | £104                                                   | £104                             | £104                      | £104                           | £104                  | £104                 | £104                 | £104                       | £104          | £0                   | £104          |
| surgery/hospital visit                 | £65                                                    | £65                              | £65                       | £65                            | £65                   | £65                  | £65                  | £65                        | £0            | £0                   | £0            |
| not face-to-face external interaction  | £54                                                    | £54                              | £54                       | £54                            | £54                   | £54                  | £27                  | £54                        | £27           | £0                   | £54           |
| not face-to-face internal interaction  | £80                                                    | £80                              | £80                       | £80                            | £80                   | £80                  | £27                  | £54                        | £0            | £0                   | £54           |
| Health visitor/midwife                 |                                                        |                                  |                           |                                |                       |                      |                      |                            |               |                      |               |
| home visit                             | £0                                                     | £0                               | £0                        | £0                             | £0                    | £0                   | £0                   | £0                         | £0            | £0                   | £0            |
| surgery/hospital visit                 | £0                                                     | £0                               | £0                        | £0                             | £0                    | £0                   | £0                   | £0                         | £0            | £0                   | £0            |
| not face-to-face external interaction  | £0                                                     | £0                               | £0                        | £0                             | £0                    | £0                   | £0                   | £0                         | £0            | £0                   | £0            |
| not face-to-face internal interaction  | £0                                                     | £0                               | £0                        | £0                             | £0                    | £0                   | £0                   | £27                        | £0            | £0                   | £0            |
| Consumables                            |                                                        |                                  |                           |                                |                       |                      |                      |                            |               |                      |               |
| Leaflet                                | £0                                                     | £0                               | £0                        | £0                             | £0                    | £0                   | £0                   | £0                         | £0            | £0                   | £0            |
| GP                                     |                                                        |                                  |                           |                                |                       |                      |                      |                            |               |                      |               |
| home visit                             | £0                                                     | £0                               | £0                        | £0                             | £0                    | £0                   | £0                   | £0                         | £0            | £0                   | £0            |
| surgery/hospital visit                 | £0                                                     | £0                               | £0                        | £0                             | £0                    | £0                   | £0                   | £0                         | £0            | £0                   | £0            |
| not face-to-face external interaction  | £0                                                     | £0                               | £0                        | £0                             | £0                    | £0                   | £0                   | £0                         | £87           | £0                   | £0            |
| not face-to-face internal interaction  | £0                                                     | £0                               | £0                        | £0                             | £0                    | £0                   | £87                  | £87                        | £87           | £0                   | £87           |
| Consultant (hospital based)            |                                                        |                                  |                           |                                |                       |                      |                      |                            |               |                      |               |
| home visit                             | £0                                                     | £0                               | £0                        | £0                             | £0                    | £0                   | £0                   | £0                         | £0            | £0                   | £0            |
| surgery/hospital visit                 | £90                                                    | £90                              | £90                       | £90                            | £90                   | £90                  | £90                  | £90                        | £0            | £0                   | £0            |
| not face-to-face external interaction  | £0                                                     | £0                               | £0                        | £0                             | £0                    | £0                   | £75                  | £0                         | £0            | £0                   | £0            |
| not face-to-face internal interaction  | £75                                                    | £75                              | £75                       | £75                            | £75                   | £75                  | £112                 | £37                        | £37           | £0                   | £0            |



## Centre 5

### Number of contacts

|                                        | Inherited metabolic disorders (IMD)                    |                                  |                           |                                |                       |                      | Hypothyroidism (CHT) | Sickle Cell Disorder (SCD) |               | Cystic Fibrosis (CF) |               |
|----------------------------------------|--------------------------------------------------------|----------------------------------|---------------------------|--------------------------------|-----------------------|----------------------|----------------------|----------------------------|---------------|----------------------|---------------|
|                                        | medium chain acyl CoA dehydrogenase deficiency (MCADD) | maple syrup urine disease (MSUD) | isovaleric aciduria (IVA) | glutaric aciduria type 1 (GA1) | phenylketonuria (PKU) | homocystinuria (HCU) |                      | NBS+: Affected             | NBS+: Carrier | NBS+: Affected       | NBS+: Carrier |
| <b>Personnel - Clinical path items</b> |                                                        |                                  |                           |                                |                       |                      |                      |                            |               |                      |               |
| CNS - Clinical nurse specialist        |                                                        |                                  |                           |                                |                       |                      |                      |                            |               |                      |               |
| home visit                             | 1                                                      | 1                                | 1                         | 1                              | 1                     | 1                    | 1                    | 0                          | 0             | 0                    | 1             |
| surgery/hospital visit                 | 1                                                      | 1                                | 1                         | 1                              | 1                     | 1                    | 1                    | 0                          | 0             | 0                    | 0             |
| not face-to-face external interaction  | 2                                                      | 2                                | 2                         | 2                              | 2                     | 2                    | 1                    | 0                          | 0             | 0                    | 1             |
| not face-to-face internal interaction  | 3                                                      | 3                                | 3                         | 3                              | 3                     | 3                    | 3                    | 0                          | 0             | 0                    | 7             |
| Health visitor/midwife                 |                                                        |                                  |                           |                                |                       |                      |                      |                            |               |                      |               |
| home visit                             | 0                                                      | 0                                | 0                         | 0                              | 0                     | 0                    | 0                    | 0                          | 0             | 0                    | 0             |
| surgery/hospital visit                 | 0                                                      | 0                                | 0                         | 0                              | 0                     | 0                    | 0                    | 0                          | 0             | 0                    | 0             |
| not face-to-face external interaction  | 0                                                      | 0                                | 0                         | 0                              | 0                     | 0                    | 0                    | 0                          | 0             | 0                    | 0             |
| not face-to-face internal interaction  | 0                                                      | 0                                | 0                         | 0                              | 0                     | 0                    | 0                    | 0                          | 0             | 0                    | 2             |
| Consumables                            |                                                        |                                  |                           |                                |                       |                      |                      |                            |               |                      |               |
| Leaflet                                |                                                        |                                  |                           |                                |                       |                      |                      |                            |               |                      |               |
| GP                                     |                                                        |                                  |                           |                                |                       |                      |                      |                            |               |                      |               |
| home visit                             | 0                                                      | 0                                | 0                         | 0                              | 0                     | 0                    | 0                    | 0                          | 0             | 0                    | 0             |
| surgery/hospital visit                 | 0                                                      | 0                                | 0                         | 0                              | 0                     | 0                    | 0                    | 0                          | 0             | 0                    | 0             |
| not face-to-face external interaction  | 0                                                      | 0                                | 0                         | 0                              | 0                     | 0                    | 0                    | 0                          | 0             | 0                    | 0             |
| not face-to-face internal interaction  | 0                                                      | 0                                | 0                         | 0                              | 0                     | 0                    | 2                    | 0                          | 0             | 0                    | 2             |
| Consultant (hospital based)            |                                                        |                                  |                           |                                |                       |                      |                      |                            |               |                      |               |
| home visit                             | 0                                                      | 0                                | 0                         | 0                              | 0                     | 0                    | 0                    | 0                          | 0             | 0                    | 0             |
| surgery/hospital visit                 | 1                                                      | 1                                | 1                         | 1                              | 1                     | 1                    | 1                    | 0                          | 0             | 0                    | 0             |
| not face-to-face external interaction  | 0                                                      | 0                                | 0                         | 0                              | 0                     | 0                    | 1                    | 0                          | 0             | 0                    | 0             |
| not face-to-face internal interaction  | 2                                                      | 2                                | 2                         | 2                              | 2                     | 2                    | 0                    | 0                          | 0             | 0                    | 0             |

Cost

|                                        | Inherited metabolic disorders (IMD)                    |                                  |                           |                                |                       |                      | Hypothyroidism (CHT) | Sickle Cell Disorder (SCD) |               | Cystic Fibrosis (CF) |               |
|----------------------------------------|--------------------------------------------------------|----------------------------------|---------------------------|--------------------------------|-----------------------|----------------------|----------------------|----------------------------|---------------|----------------------|---------------|
|                                        | medium chain acyl CoA dehydrogenase deficiency (MCADD) | maple syrup urine disease (MSUD) | isovaleric aciduria (IVA) | glutaric aciduria type 1 (GA1) | phenylketonuria (PKU) | homocystinuria (HCU) |                      | NBS+: Affected             | NBS+: Carrier | NBS+: Affected       | NBS+: Carrier |
| <b>Personnel - Clinical path items</b> |                                                        |                                  |                           |                                |                       |                      |                      |                            |               |                      |               |
| CNS - Clinical nurse specialist        |                                                        |                                  |                           |                                |                       |                      |                      |                            |               |                      |               |
| home visit                             | £104                                                   | £104                             | £104                      | £104                           | £104                  | £104                 | £104                 | £0                         | £0            | £0                   | £104          |
| surgery/hospital visit                 | £65                                                    | £65                              | £65                       | £65                            | £65                   | £65                  | £65                  | £0                         | £0            | £0                   | £0            |
| not face-to-face external interaction  | £54                                                    | £54                              | £54                       | £54                            | £54                   | £54                  | £27                  | £0                         | £0            | £0                   | £27           |
| not face-to-face internal interaction  | £80                                                    | £80                              | £80                       | £80                            | £80                   | £80                  | £80                  | £0                         | £0            | £0                   | £188          |
| Health visitor/midwife                 |                                                        |                                  |                           |                                |                       |                      |                      |                            |               |                      |               |
| home visit                             | £0                                                     | £0                               | £0                        | £0                             | £0                    | £0                   | £0                   | £0                         | £0            | £0                   | £0            |
| surgery/hospital visit                 | £0                                                     | £0                               | £0                        | £0                             | £0                    | £0                   | £0                   | £0                         | £0            | £0                   | £0            |
| not face-to-face external interaction  | £0                                                     | £0                               | £0                        | £0                             | £0                    | £0                   | £0                   | £0                         | £0            | £0                   | £0            |
| not face-to-face internal interaction  | £0                                                     | £0                               | £0                        | £0                             | £0                    | £0                   | £0                   | £0                         | £0            | £0                   | £54           |
| Consumables                            |                                                        |                                  |                           |                                |                       |                      |                      |                            |               |                      |               |
| Leaflet                                | £0                                                     | £0                               | £0                        | £0                             | £0                    | £0                   | £0                   | £0                         | £0            | £0                   | £0            |
| GP                                     |                                                        |                                  |                           |                                |                       |                      |                      |                            |               |                      |               |
| home visit                             | £0                                                     | £0                               | £0                        | £0                             | £0                    | £0                   | £0                   | £0                         | £0            | £0                   | £0            |
| surgery/hospital visit                 | £0                                                     | £0                               | £0                        | £0                             | £0                    | £0                   | £0                   | £0                         | £0            | £0                   | £0            |
| not face-to-face external interaction  | £0                                                     | £0                               | £0                        | £0                             | £0                    | £0                   | £0                   | £0                         | £0            | £0                   | £0            |
| not face-to-face internal interaction  | £0                                                     | £0                               | £0                        | £0                             | £0                    | £0                   | £175                 | £0                         | £0            | £0                   | £175          |
| Consultant (hospital based)            |                                                        |                                  |                           |                                |                       |                      |                      |                            |               |                      |               |
| home visit                             | £0                                                     | £0                               | £0                        | £0                             | £0                    | £0                   | £0                   | £0                         | £0            | £0                   | £0            |
| surgery/hospital visit                 | £90                                                    | £90                              | £90                       | £90                            | £90                   | £90                  | £90                  | £0                         | £0            | £0                   | £0            |
| not face-to-face external interaction  | £0                                                     | £0                               | £0                        | £0                             | £0                    | £0                   | £37                  | £0                         | £0            | £0                   | £0            |
| not face-to-face internal interaction  | £75                                                    | £75                              | £75                       | £75                            | £75                   | £75                  | £0                   | £0                         | £0            | £0                   | £0            |

## Centre 6

### Number of contacts

|                                        | Inherited metabolic disorders (IMD)                    |                                  |                           |                                |                       |                      | Hypothyroidism (CHT) | Sickle Cell Disorder (SCD) |               | Cystic Fibrosis (CF) |               |
|----------------------------------------|--------------------------------------------------------|----------------------------------|---------------------------|--------------------------------|-----------------------|----------------------|----------------------|----------------------------|---------------|----------------------|---------------|
|                                        | medium chain acyl CoA dehydrogenase deficiency (MCADD) | maple syrup urine disease (MSUD) | isovaleric aciduria (IVA) | glutaric aciduria type 1 (GA1) | phenylketonuria (PKU) | homocystinuria (HCU) |                      | NBS+: Affected             | NBS+: Carrier | NBS+: Affected       | NBS+: Carrier |
| <b>Personnel - Clinical path items</b> |                                                        |                                  |                           |                                |                       |                      |                      |                            |               |                      |               |
| CNS - Clinical nurse specialist        |                                                        |                                  |                           |                                |                       |                      |                      |                            |               |                      |               |
| home visit                             | 1                                                      | 1                                | 1                         | 1                              | 1                     | 1                    | 1                    | 1                          | 1             | 1                    | 1             |
| surgery/hospital visit                 | 1                                                      | 1                                | 1                         | 1                              | 1                     | 1                    | 1                    | 1                          | 0             | 1                    | 0             |
| not face-to-face external interaction  | 3                                                      | 3                                | 3                         | 3                              | 3                     | 3                    | 1                    | 2                          | 2             | 1                    | 1             |
| not face-to-face internal interaction  | 3                                                      | 3                                | 3                         | 3                              | 3                     | 3                    | 1                    | 4                          | 2             | 4                    | 7             |
| Health visitor/midwife                 |                                                        |                                  |                           |                                |                       |                      |                      |                            |               |                      |               |
| home visit                             | 0                                                      | 0                                | 0                         | 0                              | 0                     | 0                    | 0                    | 0                          | 0             | 0                    | 0             |
| surgery/hospital visit                 | 0                                                      | 0                                | 0                         | 0                              | 0                     | 0                    | 0                    | 0                          | 0             | 0                    | 0             |
| not face-to-face external interaction  | 0                                                      | 0                                | 0                         | 0                              | 0                     | 0                    | 0                    | 0                          | 0             | 0                    | 0             |
| not face-to-face internal interaction  | 0                                                      | 1                                | 1                         | 1                              | 0                     | 0                    | 0                    | 1                          | 0             | 1                    | 2             |
| Consumables                            |                                                        |                                  |                           |                                |                       |                      |                      |                            |               |                      |               |
| Leaflet                                |                                                        |                                  |                           |                                |                       |                      |                      |                            |               |                      |               |
| GP                                     |                                                        |                                  |                           |                                |                       |                      |                      |                            |               |                      |               |
| home visit                             | 0                                                      | 0                                | 0                         | 0                              | 0                     | 0                    | 0                    | 0                          | 0             | 0                    | 0             |
| surgery/hospital visit                 | 0                                                      | 0                                | 0                         | 0                              | 0                     | 0                    | 0                    | 0                          | 0             | 0                    | 0             |
| not face-to-face external interaction  | 0                                                      | 0                                | 0                         | 0                              | 0                     | 0                    | 0                    | 0                          | 0             | 0                    | 0             |
| not face-to-face internal interaction  | 1                                                      | 1                                | 1                         | 1                              | 1                     | 1                    | 1                    | 1                          | 1             | 2                    | 2             |
| Consultant (hospital based)            |                                                        |                                  |                           |                                |                       |                      |                      |                            |               |                      |               |
| home visit                             | 0                                                      | 0                                | 0                         | 0                              | 0                     | 0                    | 0                    | 0                          | 0             | 0                    | 0             |
| surgery/hospital visit                 | 1                                                      | 1                                | 1                         | 1                              | 1                     | 1                    | 1                    | 1                          | 0             | 1                    | 0             |
| not face-to-face external interaction  | 0                                                      | 0                                | 0                         | 0                              | 0                     | 0                    | 1                    | 0                          | 0             | 0                    | 0             |
| not face-to-face internal interaction  | 1                                                      | 1                                | 0                         | 0                              | 1                     | 1                    | 2                    | 1                          | 0             | 1                    | 0             |

Cost

|                                        | Inherited metabolic disorders (IMD)                    |                                  |                           |                                |                       |                      | Hypothyroidism (CHT) | Sickle Cell Disorder (SCD) |               | Cystic Fibrosis (CF) |               |
|----------------------------------------|--------------------------------------------------------|----------------------------------|---------------------------|--------------------------------|-----------------------|----------------------|----------------------|----------------------------|---------------|----------------------|---------------|
|                                        | medium chain acyl CoA dehydrogenase deficiency (MCADD) | maple syrup urine disease (MSUD) | isovaleric aciduria (IVA) | glutaric aciduria type 1 (GA1) | phenylketonuria (PKU) | homocystinuria (HCU) |                      | NBS+: Affected             | NBS+: Carrier | NBS+: Affected       | NBS+: Carrier |
| <b>Personnel - Clinical path items</b> |                                                        |                                  |                           |                                |                       |                      |                      |                            |               |                      |               |
| CNS - Clinical nurse specialist        |                                                        |                                  |                           |                                |                       |                      |                      |                            |               |                      |               |
| home visit                             | £104                                                   | £104                             | £104                      | £104                           | £104                  | £104                 | £104                 | £104                       | £104          | £104                 | £104          |
| surgery/hospital visit                 | £65                                                    | £65                              | £65                       | £65                            | £65                   | £65                  | £65                  | £65                        | £0            | £65                  | £0            |
| not face-to-face external interaction  | £80                                                    | £80                              | £80                       | £80                            | £80                   | £80                  | £27                  | £54                        | £54           | £27                  | £27           |
| not face-to-face internal interaction  | £80                                                    | £80                              | £80                       | £80                            | £80                   | £80                  | £27                  | £107                       | £54           | £107                 | £188          |
| Health visitor/midwife                 |                                                        |                                  |                           |                                |                       |                      |                      |                            |               |                      |               |
| home visit                             | £0                                                     | £0                               | £0                        | £0                             | £0                    | £0                   | £0                   | £0                         | £0            | £0                   | £0            |
| surgery/hospital visit                 | £0                                                     | £0                               | £0                        | £0                             | £0                    | £0                   | £0                   | £0                         | £0            | £0                   | £0            |
| not face-to-face external interaction  | £0                                                     | £0                               | £0                        | £0                             | £0                    | £0                   | £0                   | £0                         | £0            | £0                   | £0            |
| not face-to-face internal interaction  | £0                                                     | £27                              | £27                       | £27                            | £0                    | £0                   | £0                   | £27                        | £0            | £27                  | £54           |
| Consumables                            |                                                        |                                  |                           |                                |                       |                      |                      |                            |               |                      |               |
| Leaflet                                | £0                                                     | £0                               | £0                        | £0                             | £0                    | £0                   | £0                   | £0                         | £0            | £0                   | £0            |
| GP                                     |                                                        |                                  |                           |                                |                       |                      |                      |                            |               |                      |               |
| home visit                             | £0                                                     | £0                               | £0                        | £0                             | £0                    | £0                   | £0                   | £0                         | £0            | £0                   | £0            |
| surgery/hospital visit                 | £0                                                     | £0                               | £0                        | £0                             | £0                    | £0                   | £0                   | £0                         | £0            | £0                   | £0            |
| not face-to-face external interaction  | £0                                                     | £0                               | £0                        | £0                             | £0                    | £0                   | £0                   | £0                         | £0            | £0                   | £0            |
| not face-to-face internal interaction  | £87                                                    | £87                              | £87                       | £87                            | £87                   | £87                  | £87                  | £87                        | £87           | £175                 | £175          |
| Consultant (hospital based)            |                                                        |                                  |                           |                                |                       |                      |                      |                            |               |                      |               |
| home visit                             | £0                                                     | £0                               | £0                        | £0                             | £0                    | £0                   | £0                   | £0                         | £0            | £0                   | £0            |
| surgery/hospital visit                 | £90                                                    | £90                              | £90                       | £90                            | £90                   | £90                  | £90                  | £90                        | £0            | £90                  | £0            |
| not face-to-face external interaction  | £0                                                     | £0                               | £0                        | £0                             | £0                    | £0                   | £37                  | £0                         | £0            | £0                   | £0            |
| not face-to-face internal interaction  | £37                                                    | £37                              | £0                        | £0                             | £37                   | £37                  | £75                  | £37                        | £0            | £37                  | £0            |

# Centre 7

## Number of contacts

|                                        | Inherited metabolic disorders (IMD)                    |                                  |                           |                                |                       |                      | Hypothyroidism (CHT) | Sickle Cell Disorder (SCD) |               | Cystic Fibrosis (CF) |               |
|----------------------------------------|--------------------------------------------------------|----------------------------------|---------------------------|--------------------------------|-----------------------|----------------------|----------------------|----------------------------|---------------|----------------------|---------------|
|                                        | medium chain acyl CoA dehydrogenase deficiency (MCADD) | maple syrup urine disease (MSUD) | isovaleric aciduria (IVA) | glutaric aciduria type 1 (GA1) | phenylketonuria (PKU) | homocystinuria (HCU) |                      | NBS+: Affected             | NBS+: Carrier | NBS+: Affected       | NBS+: Carrier |
| <b>Personnel - Clinical path items</b> |                                                        |                                  |                           |                                |                       |                      |                      |                            |               |                      |               |
| CNS - Clinical nurse specialist        |                                                        |                                  |                           |                                |                       |                      |                      |                            |               |                      |               |
| home visit                             | 0                                                      | 0                                | 0                         | 0                              | 0                     | 0                    | 0                    | 1                          | 1             | 1                    | 0             |
| surgery/hospital visit                 | 0                                                      | 0                                | 0                         | 0                              | 0                     | 0                    | 0                    | 1                          | 0             | 1                    | 0             |
| not face-to-face external interaction  | 0                                                      | 0                                | 0                         | 0                              | 0                     | 0                    | 0                    | 2                          | 2             | 1                    | 0             |
| not face-to-face internal interaction  | 0                                                      | 0                                | 0                         | 0                              | 0                     | 0                    | 0                    | 4                          | 2             | 3                    | 0             |
| Health visitor/midwife                 |                                                        |                                  |                           |                                |                       |                      |                      |                            |               |                      |               |
| home visit                             | 0                                                      | 0                                | 0                         | 0                              | 0                     | 0                    | 0                    | 0                          | 0             | 0                    | 1             |
| surgery/hospital visit                 | 0                                                      | 0                                | 0                         | 0                              | 0                     | 0                    | 0                    | 0                          | 0             | 0                    | 0             |
| not face-to-face external interaction  | 0                                                      | 0                                | 0                         | 0                              | 0                     | 0                    | 0                    | 0                          | 0             | 0                    | 2             |
| not face-to-face internal interaction  | 0                                                      | 0                                | 0                         | 0                              | 0                     | 0                    | 0                    | 1                          | 0             | 0                    | 2             |
| Consumables                            |                                                        |                                  |                           |                                |                       |                      |                      |                            |               |                      |               |
| Leaflet                                |                                                        |                                  |                           |                                |                       |                      |                      |                            |               |                      |               |
| GP                                     |                                                        |                                  |                           |                                |                       |                      |                      |                            |               |                      |               |
| home visit                             | 0                                                      | 0                                | 0                         | 0                              | 0                     | 0                    | 0                    | 0                          | 0             | 0                    | 0             |
| surgery/hospital visit                 | 0                                                      | 0                                | 0                         | 0                              | 0                     | 0                    | 0                    | 0                          | 0             | 0                    | 0             |
| not face-to-face external interaction  | 0                                                      | 0                                | 0                         | 0                              | 0                     | 0                    | 0                    | 0                          | 0             | 0                    | 0             |
| not face-to-face internal interaction  | 0                                                      | 0                                | 0                         | 0                              | 0                     | 0                    | 0                    | 1                          | 1             | 1                    | 1             |
| Consultant (hospital based)            |                                                        |                                  |                           |                                |                       |                      |                      |                            |               |                      |               |
| home visit                             | 0                                                      | 0                                | 0                         | 0                              | 0                     | 0                    | 0                    | 0                          | 0             | 0                    | 0             |
| surgery/hospital visit                 | 0                                                      | 0                                | 0                         | 0                              | 0                     | 0                    | 0                    | 1                          | 0             | 1                    | 0             |
| not face-to-face external interaction  | 0                                                      | 0                                | 0                         | 0                              | 0                     | 0                    | 0                    | 0                          | 0             | 1                    | 0             |
| not face-to-face internal interaction  | 0                                                      | 0                                | 0                         | 0                              | 0                     | 0                    | 0                    | 1                          | 0             | 3                    | 0             |

Cost

|                                        | Inherited metabolic disorders (IMD)                    |                                  |                           |                                |                       |                      | Hypothyroidism (CHT) | Sickle Cell Disorder (SCD) |               | Cystic Fibrosis (CF) |               |
|----------------------------------------|--------------------------------------------------------|----------------------------------|---------------------------|--------------------------------|-----------------------|----------------------|----------------------|----------------------------|---------------|----------------------|---------------|
|                                        | medium chain acyl CoA dehydrogenase deficiency (MCADD) | maple syrup urine disease (MSUD) | isovaleric aciduria (IVA) | glutaric aciduria type 1 (GA1) | phenylketonuria (PKU) | homocystinuria (HCU) |                      | NBS+: Affected             | NBS+: Carrier | NBS+: Affected       | NBS+: Carrier |
| <b>Personnel - Clinical path items</b> |                                                        |                                  |                           |                                |                       |                      |                      |                            |               |                      |               |
| CNS - Clinical nurse specialist        |                                                        |                                  |                           |                                |                       |                      |                      |                            |               |                      |               |
| home visit                             | £0                                                     | £0                               | £0                        | £0                             | £0                    | £0                   | £0                   | £104                       | £104          | £104                 | £0            |
| surgery/hospital visit                 | £0                                                     | £0                               | £0                        | £0                             | £0                    | £0                   | £0                   | £65                        | £0            | £65                  | £0            |
| not face-to-face external interaction  | £0                                                     | £0                               | £0                        | £0                             | £0                    | £0                   | £0                   | £54                        | £54           | £27                  | £0            |
| not face-to-face internal interaction  | £0                                                     | £0                               | £0                        | £0                             | £0                    | £0                   | £0                   | £107                       | £54           | £80                  | £0            |
| Health visitor/midwife                 |                                                        |                                  |                           |                                |                       |                      |                      |                            |               |                      |               |
| home visit                             | £0                                                     | £0                               | £0                        | £0                             | £0                    | £0                   | £0                   | £0                         | £0            | £0                   | £104          |
| surgery/hospital visit                 | £0                                                     | £0                               | £0                        | £0                             | £0                    | £0                   | £0                   | £0                         | £0            | £0                   | £0            |
| not face-to-face external interaction  | £0                                                     | £0                               | £0                        | £0                             | £0                    | £0                   | £0                   | £0                         | £0            | £0                   | £54           |
| not face-to-face internal interaction  | £0                                                     | £0                               | £0                        | £0                             | £0                    | £0                   | £0                   | £27                        | £0            | £0                   | £54           |
| Consumables                            |                                                        |                                  |                           |                                |                       |                      |                      |                            |               |                      |               |
| Leaflet                                | £0                                                     | £0                               | £0                        | £0                             | £0                    | £0                   | £0                   | £0                         | £0            | £0                   | £0            |
| GP                                     |                                                        |                                  |                           |                                |                       |                      |                      |                            |               |                      |               |
| home visit                             | £0                                                     | £0                               | £0                        | £0                             | £0                    | £0                   | £0                   | £0                         | £0            | £0                   | £0            |
| surgery/hospital visit                 | £0                                                     | £0                               | £0                        | £0                             | £0                    | £0                   | £0                   | £0                         | £0            | £0                   | £0            |
| not face-to-face external interaction  | £0                                                     | £0                               | £0                        | £0                             | £0                    | £0                   | £0                   | £0                         | £0            | £0                   | £0            |
| not face-to-face internal interaction  | £0                                                     | £0                               | £0                        | £0                             | £0                    | £0                   | £0                   | £87                        | £87           | £87                  | £87           |
| Consultant (hospital based)            |                                                        |                                  |                           |                                |                       |                      |                      |                            |               |                      |               |
| home visit                             | £0                                                     | £0                               | £0                        | £0                             | £0                    | £0                   | £0                   | £0                         | £0            | £0                   | £0            |
| surgery/hospital visit                 | £0                                                     | £0                               | £0                        | £0                             | £0                    | £0                   | £0                   | £90                        | £0            | £90                  | £0            |
| not face-to-face external interaction  | £0                                                     | £0                               | £0                        | £0                             | £0                    | £0                   | £0                   | £0                         | £0            | £37                  | £0            |
| not face-to-face internal interaction  | £0                                                     | £0                               | £0                        | £0                             | £0                    | £0                   | £0                   | £37                        | £0            | £112                 | £0            |

## Centre 8

### Number of contacts

|                                        | Inherited metabolic disorders (IMD)                    |                                  |                           |                                |                       |                      | Hypothyroidism (CHT) | Sickle Cell Disorder (SCD) |               | Cystic Fibrosis (CF) |               |
|----------------------------------------|--------------------------------------------------------|----------------------------------|---------------------------|--------------------------------|-----------------------|----------------------|----------------------|----------------------------|---------------|----------------------|---------------|
|                                        | medium chain acyl CoA dehydrogenase deficiency (MCADD) | maple syrup urine disease (MSUD) | isovaleric aciduria (IVA) | glutaric aciduria type 1 (GA1) | phenylketonuria (PKU) | homocystinuria (HCU) |                      | NBS+: Affected             | NBS+: Carrier | NBS+: Affected       | NBS+: Carrier |
| <b>Personnel - Clinical path items</b> |                                                        |                                  |                           |                                |                       |                      |                      |                            |               |                      |               |
| CNS - Clinical nurse specialist        |                                                        |                                  |                           |                                |                       |                      |                      |                            |               |                      |               |
| home visit                             | 1                                                      | 1                                | 1                         | 1                              | 1                     | 1                    | 1                    | 1                          | 0             | 1                    | 1             |
| surgery/hospital visit                 | 1                                                      | 1                                | 1                         | 1                              | 1                     | 1                    | 1                    | 1                          | 0             | 1                    | 0             |
| not face-to-face external interaction  | 0                                                      | 1                                | 1                         | 1                              | 0                     | 1                    | 1                    | 2                          | 0             | 2                    | 1             |
| not face-to-face internal interaction  | 3                                                      | 2                                | 2                         | 2                              | 3                     | 2                    | 1                    | 2                          | 0             | 4                    | 1             |
| Health visitor/midwife                 |                                                        |                                  |                           |                                |                       |                      |                      |                            |               |                      |               |
| home visit                             | 1                                                      | 0                                | 0                         | 0                              | 1                     | 0                    | 0                    | 0                          | 1             | 1                    | 1             |
| surgery/hospital visit                 | 0                                                      | 0                                | 0                         | 0                              | 0                     | 0                    | 0                    | 0                          | 0             | 0                    | 0             |
| not face-to-face external interaction  | 2                                                      | 0                                | 0                         | 0                              | 2                     | 0                    | 0                    | 0                          | 2             | 0                    | 0             |
| not face-to-face internal interaction  | 1                                                      | 0                                | 0                         | 0                              | 1                     | 0                    | 0                    | 1                          | 2             | 3                    | 2             |
| Consumables                            |                                                        |                                  |                           |                                |                       |                      |                      |                            |               |                      |               |
| Leaflet                                |                                                        |                                  |                           |                                |                       |                      |                      |                            |               |                      |               |
| GP                                     |                                                        |                                  |                           |                                |                       |                      |                      |                            |               |                      |               |
| home visit                             | 0                                                      | 0                                | 0                         | 0                              | 0                     | 0                    | 0                    | 0                          | 0             | 0                    | 0             |
| surgery/hospital visit                 | 0                                                      | 0                                | 0                         | 0                              | 0                     | 0                    | 0                    | 0                          | 0             | 0                    | 0             |
| not face-to-face external interaction  | 0                                                      | 0                                | 0                         | 0                              | 0                     | 0                    | 0                    | 0                          | 0             | 0                    | 0             |
| not face-to-face internal interaction  | 0                                                      | 0                                | 0                         | 0                              | 0                     | 0                    | 1                    | 1                          | 1             | 1                    | 1             |
| Consultant (hospital based)            |                                                        |                                  |                           |                                |                       |                      |                      |                            |               |                      |               |
| home visit                             | 0                                                      | 0                                | 0                         | 0                              | 0                     | 0                    | 0                    | 0                          | 0             | 0                    | 0             |
| surgery/hospital visit                 | 1                                                      | 1                                | 1                         | 1                              | 1                     | 1                    | 1                    | 1                          | 0             | 1                    | 0             |
| not face-to-face external interaction  | 0                                                      | 1                                | 1                         | 1                              | 0                     | 1                    | 1                    | 0                          | 0             | 0                    | 0             |
| not face-to-face internal interaction  | 0                                                      | 1                                | 1                         | 1                              | 0                     | 1                    | 3                    | 1                          | 0             | 1                    | 0             |

Cost

|                                        | Inherited metabolic disorders (IMD)                    |                                  |                           |                                |                       |                      | Hypothyroidism (CHT) | Sickle Cell Disorder (SCD) |               | Cystic Fibrosis (CF) |               |
|----------------------------------------|--------------------------------------------------------|----------------------------------|---------------------------|--------------------------------|-----------------------|----------------------|----------------------|----------------------------|---------------|----------------------|---------------|
|                                        | medium chain acyl CoA dehydrogenase deficiency (MCADD) | maple syrup urine disease (MSUD) | isovaleric aciduria (IVA) | glutaric aciduria type 1 (GA1) | phenylketonuria (PKU) | homocystinuria (HCU) |                      | NBS+: Affected             | NBS+: Carrier | NBS+: Affected       | NBS+: Carrier |
| <b>Personnel - Clinical path items</b> |                                                        |                                  |                           |                                |                       |                      |                      |                            |               |                      |               |
| CNS - Clinical nurse specialist        |                                                        |                                  |                           |                                |                       |                      |                      |                            |               |                      |               |
| home visit                             | £104                                                   | £104                             | £104                      | £104                           | £104                  | £104                 | £104                 | £104                       | £0            | £104                 | £104          |
| surgery/hospital visit                 | £65                                                    | £65                              | £65                       | £65                            | £65                   | £65                  | £65                  | £65                        | £0            | £65                  | £0            |
| not face-to-face external interaction  | £0                                                     | £27                              | £27                       | £27                            | £0                    | £27                  | £27                  | £54                        | £0            | £54                  | £27           |
| not face-to-face internal interaction  | £80                                                    | £54                              | £54                       | £54                            | £80                   | £54                  | £27                  | £54                        | £0            | £107                 | £27           |
| Health visitor/midwife                 |                                                        |                                  |                           |                                |                       |                      |                      |                            |               |                      |               |
| home visit                             | £104                                                   | £0                               | £0                        | £0                             | £104                  | £0                   | £0                   | £0                         | £104          | £104                 | £104          |
| surgery/hospital visit                 | £0                                                     | £0                               | £0                        | £0                             | £0                    | £0                   | £0                   | £0                         | £0            | £0                   | £0            |
| not face-to-face external interaction  | £54                                                    | £0                               | £0                        | £0                             | £54                   | £0                   | £0                   | £0                         | £54           | £0                   | £0            |
| not face-to-face internal interaction  | £27                                                    | £0                               | £0                        | £0                             | £27                   | £0                   | £0                   | £27                        | £54           | £80                  | £54           |
| Consumables                            |                                                        |                                  |                           |                                |                       |                      |                      |                            |               |                      |               |
| Leaflet                                | £0                                                     | £0                               | £0                        | £0                             | £0                    | £0                   | £0                   | £0                         | £0            | £0                   | £0            |
| GP                                     |                                                        |                                  |                           |                                |                       |                      |                      |                            |               |                      |               |
| home visit                             | £0                                                     | £0                               | £0                        | £0                             | £0                    | £0                   | £0                   | £0                         | £0            | £0                   | £0            |
| surgery/hospital visit                 | £0                                                     | £0                               | £0                        | £0                             | £0                    | £0                   | £0                   | £0                         | £0            | £0                   | £0            |
| not face-to-face external interaction  | £0                                                     | £0                               | £0                        | £0                             | £0                    | £0                   | £0                   | £0                         | £0            | £0                   | £0            |
| not face-to-face internal interaction  | £0                                                     | £0                               | £0                        | £0                             | £0                    | £0                   | £87                  | £87                        | £87           | £87                  | £87           |
| Consultant (hospital based)            |                                                        |                                  |                           |                                |                       |                      |                      |                            |               |                      |               |
| home visit                             | £0                                                     | £0                               | £0                        | £0                             | £0                    | £0                   | £0                   | £0                         | £0            | £0                   | £0            |
| surgery/hospital visit                 | £90                                                    | £90                              | £90                       | £90                            | £90                   | £90                  | £90                  | £90                        | £0            | £90                  | £0            |
| not face-to-face external interaction  | £0                                                     | £37                              | £37                       | £37                            | £0                    | £37                  | £37                  | £0                         | £0            | £0                   | £0            |
| not face-to-face internal interaction  | £0                                                     | £37                              | £37                       | £37                            | £0                    | £37                  | £112                 | £37                        | £0            | £37                  | £0            |



# Centre 9

## Number of contacts

|                                        | Inherited metabolic disorders (IMD)                    |                                  |                           |                                |                       |                      | Hypothyroidism (CHT) | Sickle Cell Disorder (SCD) |               | Cystic Fibrosis (CF) |               |
|----------------------------------------|--------------------------------------------------------|----------------------------------|---------------------------|--------------------------------|-----------------------|----------------------|----------------------|----------------------------|---------------|----------------------|---------------|
|                                        | medium chain acyl CoA dehydrogenase deficiency (MCADD) | maple syrup urine disease (MSUD) | isovaleric aciduria (IVA) | glutaric aciduria type 1 (GA1) | phenylketonuria (PKU) | homocystinuria (HCU) |                      | NBS+: Affected             | NBS+: Carrier | NBS+: Affected       | NBS+: Carrier |
| <b>Personnel - Clinical path items</b> |                                                        |                                  |                           |                                |                       |                      |                      |                            |               |                      |               |
| CNS - Clinical nurse specialist        |                                                        |                                  |                           |                                |                       |                      |                      |                            |               |                      |               |
| home visit                             | 1                                                      | 1                                | 1                         | 1                              | 1                     | 1                    | 0                    | 1                          | 0             | 0                    | 0             |
| surgery/hospital visit                 | 1                                                      | 1                                | 1                         | 1                              | 1                     | 1                    | 1                    | 1                          | 0             | 1                    | 0             |
| not face-to-face external interaction  | 1                                                      | 1                                | 1                         | 1                              | 1                     | 1                    | 0                    | 2                          | 0             | 0                    | 0             |
| not face-to-face internal interaction  | 1                                                      | 1                                | 1                         | 1                              | 1                     | 1                    | 0                    | 1                          | 0             | 2                    | 0             |
| Health visitor/midwife                 |                                                        |                                  |                           |                                |                       |                      |                      |                            |               |                      |               |
| home visit                             | 0                                                      | 0                                | 0                         | 0                              | 0                     | 0                    | 1                    | 0                          | 1             | 1                    | 1             |
| surgery/hospital visit                 | 0                                                      | 0                                | 0                         | 0                              | 0                     | 0                    | 0                    | 0                          | 0             | 0                    | 0             |
| not face-to-face external interaction  | 1                                                      | 1                                | 1                         | 1                              | 1                     | 1                    | 2                    | 0                          | 2             | 2                    | 2             |
| not face-to-face internal interaction  | 1                                                      | 1                                | 1                         | 1                              | 1                     | 1                    | 1                    | 1                          | 1             | 2                    | 1             |
| Consumables                            |                                                        |                                  |                           |                                |                       |                      |                      |                            |               |                      |               |
| Leaflet                                |                                                        |                                  |                           |                                |                       |                      |                      |                            |               |                      |               |
| GP                                     |                                                        |                                  |                           |                                |                       |                      |                      |                            |               |                      |               |
| home visit                             | 0                                                      | 0                                | 0                         | 0                              | 0                     | 0                    | 0                    | 0                          | 0             | 0                    | 0             |
| surgery/hospital visit                 | 0                                                      | 0                                | 0                         | 0                              | 0                     | 0                    | 0                    | 0                          | 0             | 0                    | 0             |
| not face-to-face external interaction  | 0                                                      | 0                                | 0                         | 0                              | 0                     | 0                    | 0                    | 0                          | 0             | 0                    | 0             |
| not face-to-face internal interaction  | 1                                                      | 1                                | 1                         | 1                              | 1                     | 1                    | 1                    | 2                          | 1             | 1                    | 1             |
| Consultant (hospital based)            |                                                        |                                  |                           |                                |                       |                      |                      |                            |               |                      |               |
| home visit                             | 0                                                      | 0                                | 0                         | 0                              | 0                     | 0                    | 0                    | 0                          | 0             | 0                    | 0             |
| surgery/hospital visit                 | 1                                                      | 1                                | 1                         | 1                              | 1                     | 1                    | 1                    | 1                          | 0             | 1                    | 0             |
| not face-to-face external interaction  | 0                                                      | 0                                | 0                         | 0                              | 0                     | 0                    | 0                    | 0                          | 0             | 0                    | 0             |
| not face-to-face internal interaction  | 1                                                      | 1                                | 1                         | 1                              | 1                     | 1                    | 1                    | 0                          | 0             | 0                    | 0             |

Cost

|                                        | Inherited metabolic disorders (IMD)                    |                                  |                           |                                |                       |                      | Hypothyroidism (CHT) | Sickle Cell Disorder (SCD) |               | Cystic Fibrosis (CF) |               |
|----------------------------------------|--------------------------------------------------------|----------------------------------|---------------------------|--------------------------------|-----------------------|----------------------|----------------------|----------------------------|---------------|----------------------|---------------|
|                                        | medium chain acyl CoA dehydrogenase deficiency (MCADD) | maple syrup urine disease (MSUD) | isovaleric aciduria (IVA) | glutaric aciduria type 1 (GA1) | phenylketonuria (PKU) | homocystinuria (HCU) |                      | NBS+: Affected             | NBS+: Carrier | NBS+: Affected       | NBS+: Carrier |
| <b>Personnel - Clinical path items</b> |                                                        |                                  |                           |                                |                       |                      |                      |                            |               |                      |               |
| CNS - Clinical nurse specialist        |                                                        |                                  |                           |                                |                       |                      |                      |                            |               |                      |               |
| home visit                             | £104                                                   | £104                             | £104                      | £104                           | £104                  | £104                 | £0                   | £104                       | £0            | £0                   | £0            |
| surgery/hospital visit                 | £65                                                    | £65                              | £65                       | £65                            | £65                   | £65                  | £65                  | £65                        | £0            | £65                  | £0            |
| not face-to-face external interaction  | £27                                                    | £27                              | £27                       | £27                            | £27                   | £27                  | £0                   | £54                        | £0            | £0                   | £0            |
| not face-to-face internal interaction  | £27                                                    | £27                              | £27                       | £27                            | £27                   | £27                  | £0                   | £27                        | £0            | £54                  | £0            |
| Health visitor/midwife                 |                                                        |                                  |                           |                                |                       |                      |                      |                            |               |                      |               |
| home visit                             | £0                                                     | £0                               | £0                        | £0                             | £0                    | £0                   | £104                 | £0                         | £104          | £104                 | £104          |
| surgery/hospital visit                 | £0                                                     | £0                               | £0                        | £0                             | £0                    | £0                   | £0                   | £0                         | £0            | £0                   | £0            |
| not face-to-face external interaction  | £27                                                    | £27                              | £27                       | £27                            | £27                   | £27                  | £54                  | £0                         | £54           | £54                  | £54           |
| not face-to-face internal interaction  | £27                                                    | £27                              | £27                       | £27                            | £27                   | £27                  | £27                  | £27                        | £27           | £54                  | £27           |
| Consumables                            |                                                        |                                  |                           |                                |                       |                      |                      |                            |               |                      |               |
| Leaflet                                | £0                                                     | £0                               | £0                        | £0                             | £0                    | £0                   | £0                   | £0                         | £0            | £0                   | £0            |
| GP                                     |                                                        |                                  |                           |                                |                       |                      |                      |                            |               |                      |               |
| home visit                             | £0                                                     | £0                               | £0                        | £0                             | £0                    | £0                   | £0                   | £0                         | £0            | £0                   | £0            |
| surgery/hospital visit                 | £0                                                     | £0                               | £0                        | £0                             | £0                    | £0                   | £0                   | £0                         | £0            | £0                   | £0            |
| not face-to-face external interaction  | £0                                                     | £0                               | £0                        | £0                             | £0                    | £0                   | £0                   | £0                         | £0            | £0                   | £0            |
| not face-to-face internal interaction  | £87                                                    | £87                              | £87                       | £87                            | £87                   | £87                  | £87                  | £175                       | £87           | £87                  | £87           |
| Consultant (hospital based)            |                                                        |                                  |                           |                                |                       |                      |                      |                            |               |                      |               |
| home visit                             | £0                                                     | £0                               | £0                        | £0                             | £0                    | £0                   | £0                   | £0                         | £0            | £0                   | £0            |
| surgery/hospital visit                 | £90                                                    | £90                              | £90                       | £90                            | £90                   | £90                  | £90                  | £90                        | £0            | £90                  | £0            |
| not face-to-face external interaction  | £0                                                     | £0                               | £0                        | £0                             | £0                    | £0                   | £0                   | £0                         | £0            | £0                   | £0            |
| not face-to-face internal interaction  | £37                                                    | £37                              | £37                       | £37                            | £37                   | £37                  | £37                  | £0                         | £0            | £0                   | £0            |

## Centre 10

### Number of contacts

|                                        | Inherited metabolic disorders (IMD)                    |                                  |                           |                                |                       |                      | Hypothyroidism (CHT) | Sickle Cell Disorder (SCD) |               | Cystic Fibrosis (CF) |               |
|----------------------------------------|--------------------------------------------------------|----------------------------------|---------------------------|--------------------------------|-----------------------|----------------------|----------------------|----------------------------|---------------|----------------------|---------------|
|                                        | medium chain acyl CoA dehydrogenase deficiency (MCADD) | maple syrup urine disease (MSUD) | isovaleric aciduria (IVA) | glutaric aciduria type 1 (GA1) | phenylketonuria (PKU) | homocystinuria (HCU) |                      | NBS+: Affected             | NBS+: Carrier | NBS+: Affected       | NBS+: Carrier |
| <b>Personnel - Clinical path items</b> |                                                        |                                  |                           |                                |                       |                      |                      |                            |               |                      |               |
| CNS - Clinical nurse specialist        |                                                        |                                  |                           |                                |                       |                      |                      |                            |               |                      |               |
| home visit                             | 1                                                      | 1                                | 1                         | 1                              | 1                     | 1                    | 0                    | 1                          | 1             | 1                    | 1             |
| surgery/hospital visit                 | 1                                                      | 1                                | 1                         | 1                              | 1                     | 1                    | 1                    | 1                          | 0             | 1                    | 0             |
| not face-to-face external interaction  | 0                                                      | 1                                | 1                         | 1                              | 0                     | 1                    | 0                    | 2                          | 2             | 2                    | 1             |
| not face-to-face internal interaction  | 3                                                      | 2                                | 2                         | 2                              | 3                     | 2                    | 1                    | 4                          | 2             | 4                    | 0             |
| Health visitor/midwife                 |                                                        |                                  |                           |                                |                       |                      |                      |                            |               |                      |               |
| home visit                             | 1                                                      | 0                                | 0                         | 0                              | 1                     | 0                    | 1                    | 0                          | 0             | 1                    | 0             |
| surgery/hospital visit                 | 0                                                      | 0                                | 0                         | 0                              | 0                     | 0                    | 0                    | 0                          | 0             | 0                    | 0             |
| not face-to-face external interaction  | 2                                                      | 0                                | 0                         | 0                              | 2                     | 0                    | 2                    | 1                          | 0             | 0                    | 1             |
| not face-to-face internal interaction  | 1                                                      | 0                                | 0                         | 0                              | 1                     | 0                    | 1                    | 1                          | 0             | 2                    | 2             |
| Consumables                            |                                                        |                                  |                           |                                |                       |                      |                      |                            |               |                      |               |
| Leaflet                                |                                                        |                                  |                           |                                |                       |                      |                      |                            |               |                      |               |
| GP                                     |                                                        |                                  |                           |                                |                       |                      |                      |                            |               |                      |               |
| home visit                             | 0                                                      | 0                                | 0                         | 0                              | 0                     | 0                    | 0                    | 0                          | 0             | 0                    | 0             |
| surgery/hospital visit                 | 0                                                      | 0                                | 0                         | 0                              | 0                     | 0                    | 0                    | 0                          | 0             | 0                    | 0             |
| not face-to-face external interaction  | 0                                                      | 0                                | 0                         | 0                              | 0                     | 0                    | 0                    | 0                          | 0             | 0                    | 0             |
| not face-to-face internal interaction  | 0                                                      | 0                                | 0                         | 0                              | 0                     | 0                    | 0                    | 1                          | 1             | 0                    | 0             |
| Consultant (hospital based)            |                                                        |                                  |                           |                                |                       |                      |                      |                            |               |                      |               |
| home visit                             | 0                                                      | 0                                | 0                         | 0                              | 0                     | 0                    | 0                    | 0                          | 0             | 0                    | 0             |
| surgery/hospital visit                 | 1                                                      | 1                                | 1                         | 1                              | 1                     | 1                    | 1                    | 1                          | 0             | 1                    | 0             |
| not face-to-face external interaction  | 0                                                      | 1                                | 1                         | 1                              | 0                     | 1                    | 0                    | 0                          | 0             | 0                    | 0             |
| not face-to-face internal interaction  | 0                                                      | 1                                | 1                         | 1                              | 0                     | 1                    | 1                    | 1                          | 0             | 1                    | 0             |

Cost

|                                        | Inherited metabolic disorders (IMD)                    |                                  |                           |                                |                       |                      | Hypothyroidism (CHT) | Sickle Cell Disorder (SCD) |               | Cystic Fibrosis (CF) |               |
|----------------------------------------|--------------------------------------------------------|----------------------------------|---------------------------|--------------------------------|-----------------------|----------------------|----------------------|----------------------------|---------------|----------------------|---------------|
|                                        | medium chain acyl CoA dehydrogenase deficiency (MCADD) | maple syrup urine disease (MSUD) | isovaleric aciduria (IVA) | glutaric aciduria type 1 (GA1) | phenylketonuria (PKU) | homocystinuria (HCU) |                      | NBS+: Affected             | NBS+: Carrier | NBS+: Affected       | NBS+: Carrier |
| <b>Personnel - Clinical path items</b> |                                                        |                                  |                           |                                |                       |                      |                      |                            |               |                      |               |
| CNS - Clinical nurse specialist        |                                                        |                                  |                           |                                |                       |                      |                      |                            |               |                      |               |
| home visit                             | £104                                                   | £104                             | £104                      | £104                           | £104                  | £104                 | £0                   | £104                       | £104          | £104                 | £104          |
| surgery/hospital visit                 | £65                                                    | £65                              | £65                       | £65                            | £65                   | £65                  | £65                  | £65                        | £0            | £65                  | £0            |
| not face-to-face external interaction  | £0                                                     | £27                              | £27                       | £27                            | £0                    | £27                  | £0                   | £54                        | £54           | £54                  | £27           |
| not face-to-face internal interaction  | £80                                                    | £54                              | £54                       | £54                            | £80                   | £54                  | £27                  | £107                       | £54           | £107                 | £0            |
| Health visitor/midwife                 |                                                        |                                  |                           |                                |                       |                      |                      |                            |               |                      |               |
| home visit                             | £104                                                   | £0                               | £0                        | £0                             | £104                  | £0                   | £104                 | £0                         | £0            | £104                 | £0            |
| surgery/hospital visit                 | £0                                                     | £0                               | £0                        | £0                             | £0                    | £0                   | £0                   | £0                         | £0            | £0                   | £0            |
| not face-to-face external interaction  | £54                                                    | £0                               | £0                        | £0                             | £54                   | £0                   | £54                  | £27                        | £0            | £0                   | £27           |
| not face-to-face internal interaction  | £27                                                    | £0                               | £0                        | £0                             | £27                   | £0                   | £27                  | £27                        | £0            | £54                  | £54           |
| Consumables                            |                                                        |                                  |                           |                                |                       |                      |                      |                            |               |                      |               |
| Leaflet                                | £0                                                     | £0                               | £0                        | £0                             | £0                    | £0                   | £0                   | £0                         | £0            | £0                   | £0            |
| GP                                     |                                                        |                                  |                           |                                |                       |                      |                      |                            |               |                      |               |
| home visit                             | £0                                                     | £0                               | £0                        | £0                             | £0                    | £0                   | £0                   | £0                         | £0            | £0                   | £0            |
| surgery/hospital visit                 | £0                                                     | £0                               | £0                        | £0                             | £0                    | £0                   | £0                   | £0                         | £0            | £0                   | £0            |
| not face-to-face external interaction  | £0                                                     | £0                               | £0                        | £0                             | £0                    | £0                   | £0                   | £0                         | £0            | £0                   | £0            |
| not face-to-face internal interaction  | £0                                                     | £0                               | £0                        | £0                             | £0                    | £0                   | £0                   | £87                        | £87           | £0                   | £0            |
| Consultant (hospital based)            |                                                        |                                  |                           |                                |                       |                      |                      |                            |               |                      |               |
| home visit                             | £0                                                     | £0                               | £0                        | £0                             | £0                    | £0                   | £0                   | £0                         | £0            | £0                   | £0            |
| surgery/hospital visit                 | £90                                                    | £90                              | £90                       | £90                            | £90                   | £90                  | £90                  | £90                        | £0            | £90                  | £0            |
| not face-to-face external interaction  | £0                                                     | £37                              | £37                       | £37                            | £0                    | £37                  | £0                   | £0                         | £0            | £0                   | £0            |
| not face-to-face internal interaction  | £0                                                     | £37                              | £37                       | £37                            | £0                    | £37                  | £37                  | £37                        | £0            | £37                  | £0            |

# Centre 11

## Number of contacts

|                                        | Inherited metabolic disorders (IMD)                    |                                  |                           |                                |                       |                      | Hypothyroidism (CHT) | Sickle Cell Disorder (SCD) |               | Cystic Fibrosis (CF) |               |
|----------------------------------------|--------------------------------------------------------|----------------------------------|---------------------------|--------------------------------|-----------------------|----------------------|----------------------|----------------------------|---------------|----------------------|---------------|
|                                        | medium chain acyl CoA dehydrogenase deficiency (MCADD) | maple syrup urine disease (MSUD) | isovaleric aciduria (IVA) | glutaric aciduria type 1 (GA1) | phenylketonuria (PKU) | homocystinuria (HCU) |                      | NBS+: Affected             | NBS+: Carrier | NBS+: Affected       | NBS+: Carrier |
| <b>Personnel - Clinical path items</b> |                                                        |                                  |                           |                                |                       |                      |                      |                            |               |                      |               |
| CNS - Clinical nurse specialist        |                                                        |                                  |                           |                                |                       |                      |                      |                            |               |                      |               |
| home visit                             | 1                                                      | 1                                | 1                         | 1                              | 1                     | 1                    | 1                    | 1                          | 0             | 0                    | 1             |
| surgery/hospital visit                 | 1                                                      | 1                                | 1                         | 1                              | 1                     | 1                    | 1                    | 1                          | 0             | 1                    | 0             |
| not face-to-face external interaction  | 0                                                      | 0                                | 0                         | 0                              | 0                     | 0                    | 1                    | 2                          | 2             | 2                    | 2             |
| not face-to-face internal interaction  | 3                                                      | 3                                | 3                         | 3                              | 3                     | 3                    | 2                    | 4                          | 2             | 5                    | 3             |
| Health visitor/midwife                 |                                                        |                                  |                           |                                |                       |                      |                      |                            |               |                      |               |
| home visit                             | 0                                                      | 0                                | 0                         | 0                              | 0                     | 0                    | 0                    | 0                          | 1             | 2                    | 0             |
| surgery/hospital visit                 | 0                                                      | 0                                | 0                         | 0                              | 0                     | 0                    | 0                    | 0                          |               | 0                    | 0             |
| not face-to-face external interaction  | 0                                                      | 0                                | 0                         | 0                              | 0                     | 0                    | 0                    | 0                          | 2             | 0                    | 0             |
| not face-to-face internal interaction  | 0                                                      | 0                                | 0                         | 0                              | 0                     | 0                    | 0                    | 0                          | 1             | 3                    | 0             |
| Consumables                            |                                                        |                                  |                           |                                |                       |                      |                      |                            |               |                      |               |
| Leaflet                                |                                                        |                                  |                           |                                |                       |                      |                      |                            |               |                      |               |
| GP                                     |                                                        |                                  |                           |                                |                       |                      |                      |                            |               |                      |               |
| home visit                             | 0                                                      | 0                                | 0                         | 0                              | 0                     | 0                    | 0                    | 0                          | 0             | 0                    | 0             |
| surgery/hospital visit                 | 0                                                      | 0                                | 0                         | 0                              | 0                     | 0                    | 0                    | 0                          | 0             | 0                    | 0             |
| not face-to-face external interaction  | 0                                                      | 0                                | 0                         | 0                              | 0                     | 0                    | 1                    | 0                          | 0             | 0                    | 0             |
| not face-to-face internal interaction  | 1                                                      | 1                                | 1                         | 1                              | 1                     | 1                    | 1                    | 1                          | 0             | 1                    | 0             |
| Consultant (hospital based)            |                                                        |                                  |                           |                                |                       |                      |                      |                            |               |                      |               |
| home visit                             | 0                                                      | 0                                | 0                         | 0                              | 0                     | 0                    | 0                    | 0                          | 0             | 0                    | 0             |
| surgery/hospital visit                 | 1                                                      | 1                                | 1                         | 1                              | 1                     | 1                    | 1                    | 1                          | 0             | 1                    | 0             |
| not face-to-face external interaction  | 1                                                      | 1                                | 1                         | 1                              | 1                     | 1                    | 0                    | 0                          | 0             | 0                    | 0             |
| not face-to-face internal interaction  | 4                                                      | 4                                | 4                         | 4                              | 4                     | 4                    | 2                    | 2                          | 0             | 2                    | 2             |

Cost

|                                        | Inherited metabolic disorders (IMD)                    |                                  |                           |                                |                       |                      | Hypothyroidism (CHT) | Sickle Cell Disorder (SCD) |               | Cystic Fibrosis (CF) |               |
|----------------------------------------|--------------------------------------------------------|----------------------------------|---------------------------|--------------------------------|-----------------------|----------------------|----------------------|----------------------------|---------------|----------------------|---------------|
|                                        | medium chain acyl CoA dehydrogenase deficiency (MCADD) | maple syrup urine disease (MSUD) | isovaleric aciduria (IVA) | glutaric aciduria type 1 (GA1) | phenylketonuria (PKU) | homocystinuria (HCU) |                      | NBS+: Affected             | NBS+: Carrier | NBS+: Affected       | NBS+: Carrier |
| <b>Personnel - Clinical path items</b> |                                                        |                                  |                           |                                |                       |                      |                      |                            |               |                      |               |
| CNS - Clinical nurse specialist        |                                                        |                                  |                           |                                |                       |                      |                      |                            |               |                      |               |
| home visit                             | £104                                                   | £104                             | £104                      | £104                           | £104                  | £104                 | £104                 | £104                       | £0            | £0                   | £104          |
| surgery/hospital visit                 | £65                                                    | £65                              | £65                       | £65                            | £65                   | £65                  | £65                  | £65                        | £0            | £65                  | £0            |
| not face-to-face external interaction  | £0                                                     | £0                               | £0                        | £0                             | £0                    | £0                   | £27                  | £54                        | £54           | £54                  | £54           |
| not face-to-face internal interaction  | £80                                                    | £80                              | £80                       | £80                            | £80                   | £80                  | £54                  | £107                       | £54           | £134                 | £80           |
| Health visitor/midwife                 |                                                        |                                  |                           |                                |                       |                      |                      |                            |               |                      |               |
| home visit                             | £0                                                     | £0                               | £0                        | £0                             | £0                    | £0                   | £0                   | £0                         | £104          | £208                 | £0            |
| surgery/hospital visit                 | £0                                                     | £0                               | £0                        | £0                             | £0                    | £0                   | £0                   | £0                         | £0            | £0                   | £0            |
| not face-to-face external interaction  | £0                                                     | £0                               | £0                        | £0                             | £0                    | £0                   | £0                   | £0                         | £54           | £0                   | £0            |
| not face-to-face internal interaction  | £0                                                     | £0                               | £0                        | £0                             | £0                    | £0                   | £0                   | £0                         | £27           | £80                  | £0            |
| Consumables                            |                                                        |                                  |                           |                                |                       |                      |                      |                            |               |                      |               |
| Leaflet                                | £0                                                     | £0                               | £0                        | £0                             | £0                    | £0                   | £0                   | £0                         | £0            | £0                   | £0            |
| GP                                     |                                                        |                                  |                           |                                |                       |                      |                      |                            |               |                      |               |
| home visit                             | £0                                                     | £0                               | £0                        | £0                             | £0                    | £0                   | £0                   | £0                         | £0            | £0                   | £0            |
| surgery/hospital visit                 | £0                                                     | £0                               | £0                        | £0                             | £0                    | £0                   | £0                   | £0                         | £0            | £0                   | £0            |
| not face-to-face external interaction  | £0                                                     | £0                               | £0                        | £0                             | £0                    | £0                   | £87                  | £0                         | £0            | £0                   | £0            |
| not face-to-face internal interaction  | £87                                                    | £87                              | £87                       | £87                            | £87                   | £87                  | £87                  | £87                        | £0            | £87                  | £0            |
| Consultant (hospital based)            |                                                        |                                  |                           |                                |                       |                      |                      |                            |               |                      |               |
| home visit                             | £0                                                     | £0                               | £0                        | £0                             | £0                    | £0                   | £0                   | £0                         | £0            | £0                   | £0            |
| surgery/hospital visit                 | £90                                                    | £90                              | £90                       | £90                            | £90                   | £90                  | £90                  | £90                        | £0            | £90                  | £0            |
| not face-to-face external interaction  | £37                                                    | £37                              | £37                       | £37                            | £37                   | £37                  | £0                   | £0                         | £0            | £0                   | £0            |
| not face-to-face internal interaction  | £150                                                   | £150                             | £150                      | £150                           | £150                  | £150                 | £75                  | £75                        | £0            | £75                  | £75           |

## Centre 12

### Number of contacts

|                                        | Inherited metabolic disorders (IMD)                    |                                  |                           |                                |                       |                      | Hypothyroidism (CHT) | Sickle Cell Disorder (SCD) |               | Cystic Fibrosis (CF) |               |
|----------------------------------------|--------------------------------------------------------|----------------------------------|---------------------------|--------------------------------|-----------------------|----------------------|----------------------|----------------------------|---------------|----------------------|---------------|
|                                        | medium chain acyl CoA dehydrogenase deficiency (MCADD) | maple syrup urine disease (MSUD) | isovaleric aciduria (IVA) | glutaric aciduria type 1 (GA1) | phenylketonuria (PKU) | homocystinuria (HCU) |                      | NBS+: Affected             | NBS+: Carrier | NBS+: Affected       | NBS+: Carrier |
| <b>Personnel - Clinical path items</b> |                                                        |                                  |                           |                                |                       |                      |                      |                            |               |                      |               |
| CNS - Clinical nurse specialist        |                                                        |                                  |                           |                                |                       |                      |                      |                            |               |                      |               |
| home visit                             | 1                                                      | 1                                | 1                         | 1                              | 1                     | 1                    | 1                    | 1                          | 1             | 1                    | 1             |
| surgery/hospital visit                 | 1                                                      | 1                                | 1                         | 1                              | 1                     | 1                    | 1                    | 1                          | 0             | 1                    | 0             |
| not face-to-face external interaction  | 2                                                      | 2                                | 2                         | 2                              | 2                     | 2                    | 2                    | 2                          | 2             | 2                    | 3             |
| not face-to-face internal interaction  | 4                                                      | 4                                | 4                         | 4                              | 4                     | 4                    | 5                    | 3                          | 2             | 6                    | 2             |
| Health visitor/midwife                 |                                                        |                                  |                           |                                |                       |                      |                      |                            |               |                      |               |
| home visit                             | 0                                                      | 0                                | 0                         | 0                              | 0                     | 0                    | 0                    | 0                          | 0             | 0                    | 0             |
| surgery/hospital visit                 | 0                                                      | 0                                | 0                         | 0                              | 0                     | 0                    | 0                    | 0                          | 0             | 0                    | 0             |
| not face-to-face external interaction  | 0                                                      | 0                                | 0                         | 0                              | 0                     | 0                    | 0                    | 0                          | 0             | 0                    | 0             |
| not face-to-face internal interaction  | 1                                                      | 1                                | 1                         | 1                              | 1                     | 1                    | 1                    | 0                          | 0             | 1                    | 0             |
| Consumables                            |                                                        |                                  |                           |                                |                       |                      |                      |                            |               |                      |               |
| Leaflet                                |                                                        |                                  |                           |                                |                       |                      |                      |                            |               |                      |               |
| GP                                     |                                                        |                                  |                           |                                |                       |                      |                      |                            |               |                      |               |
| home visit                             | 0                                                      | 0                                | 0                         | 0                              | 0                     | 0                    | 0                    | 0                          | 0             | 0                    | 0             |
| surgery/hospital visit                 | 0                                                      | 0                                | 0                         | 0                              | 0                     | 0                    | 0                    | 0                          | 0             | 0                    | 0             |
| not face-to-face external interaction  | 0                                                      | 0                                | 0                         | 0                              | 0                     | 0                    | 0                    | 0                          | 0             | 0                    | 0             |
| not face-to-face internal interaction  | 2                                                      | 2                                | 2                         | 2                              | 2                     | 2                    | 2                    | 1                          | 1             | 2                    | 1             |
| Consultant (hospital based)            |                                                        |                                  |                           |                                |                       |                      |                      |                            |               |                      |               |
| home visit                             | 0                                                      | 0                                | 0                         | 0                              | 0                     | 0                    | 0                    | 0                          | 0             | 0                    | 0             |
| surgery/hospital visit                 | 1                                                      | 1                                | 1                         | 1                              | 1                     | 1                    | 1                    | 1                          | 0             | 1                    | 0             |
| not face-to-face external interaction  | 0                                                      | 0                                | 0                         | 0                              | 0                     | 0                    | 0                    | 0                          | 0             | 0                    | 0             |
| not face-to-face internal interaction  | 2                                                      | 2                                | 2                         | 2                              | 2                     | 2                    | 3                    | 2                          | 0             | 1                    | 0             |

Cost

|                                        | Inherited metabolic disorders (IMD)                    |                                  |                           |                                |                       |                      | Hypothyroidism (CHT) | Sickle Cell Disorder (SCD) |               | Cystic Fibrosis (CF) |               |
|----------------------------------------|--------------------------------------------------------|----------------------------------|---------------------------|--------------------------------|-----------------------|----------------------|----------------------|----------------------------|---------------|----------------------|---------------|
|                                        | medium chain acyl CoA dehydrogenase deficiency (MCADD) | maple syrup urine disease (MSUD) | isovaleric aciduria (IVA) | glutaric aciduria type 1 (GA1) | phenylketonuria (PKU) | homocystinuria (HCU) |                      |                            |               |                      |               |
| <b>Personnel - Clinical path items</b> |                                                        |                                  |                           |                                |                       |                      |                      | NBS+: Affected             | NBS+: Carrier | NBS+: Affected       | NBS+: Carrier |
| CNS - Clinical nurse specialist        |                                                        |                                  |                           |                                |                       |                      |                      |                            |               |                      |               |
| home visit                             | £104                                                   | £104                             | £104                      | £104                           | £104                  | £104                 | £104                 | £104                       | £104          | £104                 | £104          |
| surgery/hospital visit                 | £65                                                    | £65                              | £65                       | £65                            | £65                   | £65                  | £65                  | £65                        | £0            | £65                  | £0            |
| not face-to-face external interaction  | £54                                                    | £54                              | £54                       | £54                            | £54                   | £54                  | £54                  | £54                        | £54           | £54                  | £80           |
| not face-to-face internal interaction  | £107                                                   | £107                             | £107                      | £107                           | £107                  | £107                 | £134                 | £80                        | £54           | £161                 | £54           |
| Health visitor/midwife                 |                                                        |                                  |                           |                                |                       |                      |                      |                            |               |                      |               |
| home visit                             | £0                                                     | £0                               | £0                        | £0                             | £0                    | £0                   | £0                   | £0                         | £0            | £0                   | £0            |
| surgery/hospital visit                 | £0                                                     | £0                               | £0                        | £0                             | £0                    | £0                   | £0                   | £0                         | £0            | £0                   | £0            |
| not face-to-face external interaction  | £0                                                     | £0                               | £0                        | £0                             | £0                    | £0                   | £0                   | £0                         | £0            | £0                   | £0            |
| not face-to-face internal interaction  | £27                                                    | £27                              | £27                       | £27                            | £27                   | £27                  | £27                  | £0                         | £0            | £27                  | £0            |
| Consumables                            |                                                        |                                  |                           |                                |                       |                      |                      |                            |               |                      |               |
| Leaflet                                | £0                                                     | £0                               | £0                        | £0                             | £0                    | £0                   | £0                   | £0                         | £0            | £0                   | £0            |
| GP                                     |                                                        |                                  |                           |                                |                       |                      |                      |                            |               |                      |               |
| home visit                             | £0                                                     | £0                               | £0                        | £0                             | £0                    | £0                   | £0                   | £0                         | £0            | £0                   | £0            |
| surgery/hospital visit                 | £0                                                     | £0                               | £0                        | £0                             | £0                    | £0                   | £0                   | £0                         | £0            | £0                   | £0            |
| not face-to-face external interaction  | £0                                                     | £0                               | £0                        | £0                             | £0                    | £0                   | £0                   | £0                         | £0            | £0                   | £0            |
| not face-to-face internal interaction  | £175                                                   | £175                             | £175                      | £175                           | £175                  | £175                 | £175                 | £87                        | £87           | £175                 | £87           |
| Consultant (hospital based)            |                                                        |                                  |                           |                                |                       |                      |                      |                            |               |                      |               |
| home visit                             | £0                                                     | £0                               | £0                        | £0                             | £0                    | £0                   | £0                   | £0                         | £0            | £0                   | £0            |
| surgery/hospital visit                 | £90                                                    | £90                              | £90                       | £90                            | £90                   | £90                  | £90                  | £90                        | £0            | £90                  | £0            |
| not face-to-face external interaction  | £0                                                     | £0                               | £0                        | £0                             | £0                    | £0                   | £0                   | £0                         | £0            | £0                   | £0            |
| not face-to-face internal interaction  | £75                                                    | £75                              | £75                       | £75                            | £75                   | £75                  | £112                 | £75                        | £0            | £37                  | £0            |



# Centre 13

## Number of contacts

|                                        | Inherited metabolic disorders (IMD)                    |                                  |                           |                                |                       |                      | Hypothyroidism (CHT) | Sickle Cell Disorder (SCD) |               | Cystic Fibrosis (CF) |               |
|----------------------------------------|--------------------------------------------------------|----------------------------------|---------------------------|--------------------------------|-----------------------|----------------------|----------------------|----------------------------|---------------|----------------------|---------------|
|                                        | medium chain acyl CoA dehydrogenase deficiency (MCADD) | maple syrup urine disease (MSUD) | isovaleric aciduria (IVA) | glutaric aciduria type 1 (GA1) | phenylketonuria (PKU) | homocystinuria (HCU) |                      | NBS+: Affected             | NBS+: Carrier | NBS+: Affected       | NBS+: Carrier |
| <b>Personnel - Clinical path items</b> |                                                        |                                  |                           |                                |                       |                      |                      |                            |               |                      |               |
| CNS - Clinical nurse specialist        |                                                        |                                  |                           |                                |                       |                      |                      |                            |               |                      |               |
| home visit                             | 1                                                      | 1                                | 1                         | 1                              | 1                     | 1                    | 1                    | 1                          | 1             | 1                    | 1             |
| surgery/hospital visit                 | 1                                                      | 1                                | 1                         | 1                              | 1                     | 1                    | 1                    | 1                          | 0             | 1                    | 0             |
| not face-to-face external interaction  | 1                                                      | 2                                | 2                         | 2                              | 1                     | 2                    | 1                    | 1                          | 2             | 2                    | 2             |
| not face-to-face internal interaction  | 1                                                      | 3                                | 3                         | 3                              | 1                     | 3                    | 3                    | 0                          | 2             | 4                    | 4             |
| Health visitor/midwife                 |                                                        |                                  |                           |                                |                       |                      |                      |                            |               |                      |               |
| home visit                             | 0                                                      | 0                                | 0                         | 0                              | 0                     | 0                    | 0                    | 0                          | 0             | 0                    |               |
| surgery/hospital visit                 | 0                                                      | 0                                | 0                         | 0                              | 0                     | 0                    | 0                    | 0                          | 0             | 0                    |               |
| not face-to-face external interaction  | 0                                                      | 0                                | 0                         | 0                              | 0                     | 0                    | 0                    | 0                          | 0             | 0                    |               |
| not face-to-face internal interaction  | 0                                                      | 0                                | 0                         | 0                              | 0                     | 0                    | 1                    | 1                          | 2             | 2                    | 1             |
| Consumables                            |                                                        |                                  |                           |                                |                       |                      |                      |                            |               |                      |               |
| Leaflet                                |                                                        |                                  |                           |                                |                       |                      |                      |                            |               |                      |               |
| GP                                     |                                                        |                                  |                           |                                |                       |                      |                      |                            |               |                      |               |
| home visit                             | 0                                                      | 0                                | 0                         | 0                              | 0                     | 0                    | 0                    | 0                          | 0             | 0                    |               |
| surgery/hospital visit                 | 0                                                      | 0                                | 0                         | 0                              | 0                     | 0                    | 0                    | 0                          | 0             | 0                    |               |
| not face-to-face external interaction  | 0                                                      | 0                                | 0                         | 0                              | 0                     | 0                    | 0                    | 0                          | 0             | 0                    |               |
| not face-to-face internal interaction  | 0                                                      | 0                                | 0                         | 0                              | 0                     | 0                    | 2                    | 1                          | 1             | 3                    | 2             |
| Consultant (hospital based)            |                                                        |                                  |                           |                                |                       |                      |                      |                            |               |                      |               |
| home visit                             | 0                                                      | 0                                | 0                         | 0                              | 0                     | 0                    | 0                    | 0                          | 0             | 0                    | 0             |
| surgery/hospital visit                 | 1                                                      | 1                                | 1                         | 1                              | 1                     | 1                    | 1                    | 1                          | 0             | 1                    | 0             |
| not face-to-face external interaction  | 1                                                      | 0                                | 0                         | 0                              | 1                     | 0                    | 1                    | 0                          | 0             | 0                    | 0             |
| not face-to-face internal interaction  | 1                                                      | 2                                | 2                         | 2                              | 1                     | 2                    | 4                    | 6                          | 0             | 4                    | 0             |

Cost

|                                        | Inherited metabolic disorders (IMD)                    |                                  |                           |                                |                       |                      | Hypothyroidism (CHT) | Sickle Cell Disorder (SCD) |               | Cystic Fibrosis (CF) |               |
|----------------------------------------|--------------------------------------------------------|----------------------------------|---------------------------|--------------------------------|-----------------------|----------------------|----------------------|----------------------------|---------------|----------------------|---------------|
|                                        | medium chain acyl CoA dehydrogenase deficiency (MCADD) | maple syrup urine disease (MSUD) | isovaleric aciduria (IVA) | glutaric aciduria type 1 (GA1) | phenylketonuria (PKU) | homocystinuria (HCU) |                      | NBS+: Affected             | NBS+: Carrier | NBS+: Affected       | NBS+: Carrier |
| <b>Personnel - Clinical path items</b> |                                                        |                                  |                           |                                |                       |                      |                      |                            |               |                      |               |
| CNS - Clinical nurse specialist        |                                                        |                                  |                           |                                |                       |                      |                      |                            |               |                      |               |
| home visit                             | £104                                                   | £104                             | £104                      | £104                           | £104                  | £104                 | £104                 | £104                       | £104          | £104                 | £104          |
| surgery/hospital visit                 | £65                                                    | £65                              | £65                       | £65                            | £65                   | £65                  | £65                  | £65                        | £0            | £65                  | £0            |
| not face-to-face external interaction  | £27                                                    | £54                              | £54                       | £54                            | £27                   | £54                  | £27                  | £27                        | £54           | £54                  | £54           |
| not face-to-face internal interaction  | £27                                                    | £80                              | £80                       | £80                            | £27                   | £80                  | £80                  | £0                         | £54           | £107                 | £107          |
| Health visitor/midwife                 |                                                        |                                  |                           |                                |                       |                      |                      |                            |               |                      |               |
| home visit                             | £0                                                     | £0                               | £0                        | £0                             | £0                    | £0                   | £0                   | £0                         | £0            | £0                   | £0            |
| surgery/hospital visit                 | £0                                                     | £0                               | £0                        | £0                             | £0                    | £0                   | £0                   | £0                         | £0            | £0                   | £0            |
| not face-to-face external interaction  | £0                                                     | £0                               | £0                        | £0                             | £0                    | £0                   | £0                   | £0                         | £0            | £0                   | £0            |
| not face-to-face internal interaction  | £0                                                     | £0                               | £0                        | £0                             | £0                    | £0                   | £27                  | £27                        | £54           | £54                  | £27           |
| Consumables                            |                                                        |                                  |                           |                                |                       |                      |                      |                            |               |                      |               |
| Leaflet                                | £0                                                     | £0                               | £0                        | £0                             | £0                    | £0                   | £0                   | £0                         | £0            | £0                   | £0            |
| GP                                     |                                                        |                                  |                           |                                |                       |                      |                      |                            |               |                      |               |
| home visit                             | £0                                                     | £0                               | £0                        | £0                             | £0                    | £0                   | £0                   | £0                         | £0            | £0                   | £0            |
| surgery/hospital visit                 | £0                                                     | £0                               | £0                        | £0                             | £0                    | £0                   | £0                   | £0                         | £0            | £0                   | £0            |
| not face-to-face external interaction  | £0                                                     | £0                               | £0                        | £0                             | £0                    | £0                   | £0                   | £0                         | £0            | £0                   | £0            |
| not face-to-face internal interaction  | £0                                                     | £0                               | £0                        | £0                             | £0                    | £0                   | £175                 | £87                        | £87           | £262                 | £175          |
| Consultant (hospital based)            |                                                        |                                  |                           |                                |                       |                      |                      |                            |               |                      |               |
| home visit                             | £0                                                     | £0                               | £0                        | £0                             | £0                    | £0                   | £0                   | £0                         | £0            | £0                   | £0            |
| surgery/hospital visit                 | £90                                                    | £90                              | £90                       | £90                            | £90                   | £90                  | £90                  | £90                        | £0            | £90                  | £0            |
| not face-to-face external interaction  | £37                                                    | £0                               | £0                        | £0                             | £37                   | £0                   | £37                  | £0                         | £0            | £0                   | £0            |
| not face-to-face internal interaction  | £37                                                    | £75                              | £75                       | £75                            | £37                   | £75                  | £150                 | £224                       | £0            | £150                 | £0            |

# Centre 14

## Number of contacts

|                                        | Inherited metabolic disorders (IMD)                    |                                  |                           |                                |                       |                      | Hypothyroidism (CHT) | Sickle Cell Disorder (SCD) |               | Cystic Fibrosis (CF) |               |
|----------------------------------------|--------------------------------------------------------|----------------------------------|---------------------------|--------------------------------|-----------------------|----------------------|----------------------|----------------------------|---------------|----------------------|---------------|
|                                        | medium chain acyl CoA dehydrogenase deficiency (MCADD) | maple syrup urine disease (MSUD) | isovaleric aciduria (IVA) | glutaric aciduria type 1 (GA1) | phenylketonuria (PKU) | homocystinuria (HCU) |                      | NBS+: Affected             | NBS+: Carrier | NBS+: Affected       | NBS+: Carrier |
| <b>Personnel - Clinical path items</b> |                                                        |                                  |                           |                                |                       |                      |                      |                            |               |                      |               |
| CNS - Clinical nurse specialist        |                                                        |                                  |                           |                                |                       |                      |                      |                            |               |                      |               |
| home visit                             | 1                                                      | 1                                | 1                         | 1                              | 1                     | 1                    | 1                    | 1                          | 1             | 1                    | 0             |
| surgery/hospital visit                 | 1                                                      | 1                                | 1                         | 1                              | 1                     | 1                    | 1                    | 1                          | 0             | 1                    | 0             |
| not face-to-face external interaction  | 2                                                      | 2                                | 2                         | 2                              | 2                     | 2                    | 1                    | 2                          | 3             | 2                    | 2             |
| not face-to-face internal interaction  | 4                                                      | 4                                | 4                         | 4                              | 4                     | 4                    | 0                    | 4                          | 4             | 5                    | 3             |
| Health visitor/midwife                 |                                                        |                                  |                           |                                |                       |                      |                      |                            |               |                      |               |
| home visit                             | 0                                                      | 0                                | 0                         | 0                              | 0                     | 0                    | 0                    | 0                          | 0             | 0                    | 1             |
| surgery/hospital visit                 | 0                                                      | 0                                | 0                         | 0                              | 0                     | 0                    | 0                    | 0                          | 0             | 0                    | 0             |
| not face-to-face external interaction  | 0                                                      | 0                                | 0                         | 0                              | 0                     | 0                    | 0                    | 0                          | 0             | 0                    | 0             |
| not face-to-face internal interaction  | 1                                                      | 1                                | 1                         | 1                              | 1                     | 1                    | 0                    | 1                          | 1             | 1                    | 1             |
| Consumables                            |                                                        |                                  |                           |                                |                       |                      |                      |                            |               |                      |               |
| Leaflet                                |                                                        |                                  |                           |                                |                       |                      |                      |                            |               |                      |               |
| GP                                     |                                                        |                                  |                           |                                |                       |                      |                      |                            |               |                      |               |
| home visit                             | 0                                                      | 0                                | 0                         | 0                              | 0                     | 0                    | 0                    | 0                          | 0             | 0                    | 0             |
| surgery/hospital visit                 | 0                                                      | 0                                | 0                         | 0                              | 0                     | 0                    | 0                    | 0                          | 0             | 0                    | 0             |
| not face-to-face external interaction  | 0                                                      | 0                                | 0                         | 0                              | 0                     | 0                    | 0                    | 0                          | 0             | 0                    | 0             |
| not face-to-face internal interaction  | 1                                                      | 1                                | 1                         | 1                              | 1                     | 1                    | 1                    | 1                          | 1             | 1                    | 0             |
| Consultant (hospital based)            |                                                        |                                  |                           |                                |                       |                      |                      |                            |               |                      |               |
| home visit                             | 0                                                      | 0                                | 0                         | 0                              | 0                     | 0                    | 0                    | 0                          | 0             | 0                    | 0             |
| surgery/hospital visit                 | 1                                                      | 1                                | 1                         | 1                              | 1                     | 1                    | 1                    | 1                          | 0             | 1                    | 0             |
| not face-to-face external interaction  | 0                                                      | 0                                | 0                         | 0                              | 0                     | 0                    | 1                    | 0                          | 0             | 0                    | 0             |
| not face-to-face internal interaction  | 3                                                      | 3                                | 3                         | 3                              | 3                     | 3                    | 4                    | 3                          | 0             | 0                    | 0             |

Cost

|                                       | Inherited metabolic disorders (IMD)                    |                                  |                           |                                |                       |                      | Hypothyroidism (CHT) | Sickle Cell Disorder (SCD) |               | Cystic Fibrosis (CF) |               |
|---------------------------------------|--------------------------------------------------------|----------------------------------|---------------------------|--------------------------------|-----------------------|----------------------|----------------------|----------------------------|---------------|----------------------|---------------|
|                                       | medium chain acyl CoA dehydrogenase deficiency (MCADD) | maple syrup urine disease (MSUD) | isovaleric aciduria (IVA) | glutaric aciduria type 1 (GA1) | phenylketonuria (PKU) | homocystinuria (HCU) |                      |                            |               |                      |               |
| Personnel - Clinical path items       |                                                        |                                  |                           |                                |                       |                      |                      | NBS+: Affected             | NBS+: Carrier | NBS+: Affected       | NBS+: Carrier |
| CNS - Clinical nurse specialist       |                                                        |                                  |                           |                                |                       |                      |                      |                            |               |                      |               |
| home visit                            | £104                                                   | £104                             | £104                      | £104                           | £104                  | £104                 | £104                 | £104                       | £104          | £104                 | £0            |
| surgery/hospital visit                | £65                                                    | £65                              | £65                       | £65                            | £65                   | £65                  | £65                  | £65                        | £0            | £65                  | £0            |
| not face-to-face external interaction | £54                                                    | £54                              | £54                       | £54                            | £54                   | £54                  | £27                  | £54                        | £80           | £54                  | £54           |
| not face-to-face internal interaction | £107                                                   | £107                             | £107                      | £107                           | £107                  | £107                 | £0                   | £107                       | £107          | £134                 | £80           |
| Health visitor/midwife                |                                                        |                                  |                           |                                |                       |                      |                      |                            |               |                      |               |
| home visit                            | £0                                                     | £0                               | £0                        | £0                             | £0                    | £0                   | £0                   | £0                         | £0            | £0                   | £104          |
| surgery/hospital visit                | £0                                                     | £0                               | £0                        | £0                             | £0                    | £0                   | £0                   | £0                         | £0            | £0                   | £0            |
| not face-to-face external interaction | £0                                                     | £0                               | £0                        | £0                             | £0                    | £0                   | £0                   | £0                         | £0            | £0                   | £0            |
| not face-to-face internal interaction | £27                                                    | £27                              | £27                       | £27                            | £27                   | £27                  | £0                   | £27                        | £27           | £27                  | £27           |
| Consumables                           |                                                        |                                  |                           |                                |                       |                      |                      |                            |               |                      |               |
| Leaflet                               | £0                                                     | £0                               | £0                        | £0                             | £0                    | £0                   | £0                   | £0                         | £0            | £0                   | £0            |
| GP                                    |                                                        |                                  |                           |                                |                       |                      |                      |                            |               |                      |               |
| home visit                            | £0                                                     | £0                               | £0                        | £0                             | £0                    | £0                   | £0                   | £0                         | £0            | £0                   | £0            |
| surgery/hospital visit                | £0                                                     | £0                               | £0                        | £0                             | £0                    | £0                   | £0                   | £0                         | £0            | £0                   | £0            |
| not face-to-face external interaction | £0                                                     | £0                               | £0                        | £0                             | £0                    | £0                   | £0                   | £0                         | £0            | £0                   | £0            |
| not face-to-face internal interaction | £87                                                    | £87                              | £87                       | £87                            | £87                   | £87                  | £87                  | £87                        | £87           | £87                  | £0            |
| Consultant (hospital based)           |                                                        |                                  |                           |                                |                       |                      |                      |                            |               |                      |               |
| home visit                            | £0                                                     | £0                               | £0                        | £0                             | £0                    | £0                   | £0                   | £0                         | £0            | £0                   | £0            |
| surgery/hospital visit                | £90                                                    | £90                              | £90                       | £90                            | £90                   | £90                  | £90                  | £90                        | £0            | £90                  | £0            |
| not face-to-face external interaction | £0                                                     | £0                               | £0                        | £0                             | £0                    | £0                   | £37                  | £0                         | £0            | £0                   | £0            |
| not face-to-face internal interaction | £112                                                   | £112                             | £112                      | £112                           | £112                  | £112                 | £150                 | £112                       | £0            | £0                   | £0            |
