# Supplementary material
Source: MDPI journal article supplement (https://www.mdpi.com/2409-515X/8/1/19)
Supplement: s1 [file s1]

Table S4. Sensitivity analysis: Average cost (95% Confidence Intervals) (£)

|                                 | MCADD                        | MSUD                         | IVA                          | GA1                          | PKU                          | HCU                          | CHT                          | SCD - affected               | SCD - carrier                | Cf - affected                | Cf - carrier                 |
|---------------------------------|------------------------------|------------------------------|------------------------------|------------------------------|------------------------------|------------------------------|------------------------------|------------------------------|------------------------------|------------------------------|------------------------------|
| <b>Basecase</b>                 |                              |                              |                              |                              |                              |                              |                              |                              |                              |                              |                              |
| SP                              | 437.02<br>(372.34 to 504.98) | 444.47<br>(375.61 to 516.82) | 440.73<br>(372.34 to 513.85) | 466.87<br>(383.31 to 531.79) | 470.49<br>(383.95 to 533.55) | 462.56<br>(379.15 to 527.23) | 500.64<br>(446.15 to 556.51) | 564.14<br>(504.36 to 609.83) | 237.12<br>(190.58 to 279.04) | 628.51<br>(582.22 to 687.9)  | 265.35<br>(196.23 to 331.83) |
| IP - home visit                 | 542.68<br>(484.71 to 603.17) | 549.97<br>(488.83 to 614.19) | 546.23<br>(486.19 to 609.63) | 546.23<br>(486.19 to 609.63) | 550.19<br>(487.85 to 614.93) | 547.28<br>(486.6 to 610.31)  | 574.71<br>(523.64 to 634.67) | 565.97<br>(540.73 to 590.04) | 312.84<br>(292.93 to 328.97) | 646.39<br>(597.88 to 719.74) | 355.36<br>(302.58 to 417.4)  |
| IP - teleconsultation           | 473.91<br>(413.37 to 530.01) | 490.07<br>(422.16 to 552.52) | 483.65<br>(419.7 to 542.68)  | 475.6<br>(413.26 to 540.43)  | 474.2<br>(410.95 to 539.18)  | 479 (415.65 to 537.91)       | 497.67<br>(446.59 to 557.62) | 488.92<br>(463.69 to 513)    | 235.79<br>(215.88 to 251.92) | 552.03<br>(502.98 to 623.42) | 268.26<br>(213.87 to 331.19) |
| <b>Home visit time -25%</b>     |                              |                              |                              |                              |                              |                              |                              |                              |                              |                              |                              |
| SP                              | 432.3<br>(367.53 to 500.78)  | 444.47<br>(375.61 to 516.82) | 440.73<br>(372.34 to 513.85) | 461.67<br>(382.32 to 526.25) | 460.1<br>(378.49 to 524.31)  | 457.36<br>(378.47 to 522.37) | 492.65<br>(437.31 to 550.98) | 538.17<br>(482.33 to 580.8)  | 217.64<br>(176.89 to 253.08) | 593.88<br>(552.16 to 650.55) | 249.37<br>(184.65 to 316.44) |
| IP - home visit                 | 514.35<br>(456.28 to 575.07) | 524 (462.87 to 588.23)       | 520.26<br>(460.22 to 583.66) | 520.26<br>(460.22 to 583.66) | 521.63<br>(458.66 to 586.8)  | 521.31<br>(460.63 to 584.34) | 548.75<br>(497.67 to 608.7)  | 540 (514.77 to 564.07)       | 286.87<br>(266.96 to 303)    | 611.76<br>(564.91 to 683.7)  | 325.4<br>(274.43 to 387.49)  |
| IP - teleconsultation           | 471.55<br>(410.8 to 528.1)   | 490.07<br>(422.16 to 552.52) | 483.65<br>(419.7 to 542.68)  | 475.6<br>(413.26 to 540.43)  | 471.6<br>(407.81 to 537.6)   | 476.4<br>(414.32 to 536.8)   | 497.67<br>(446.59 to 557.62) | 488.92<br>(463.69 to 513)    | 235.79<br>(215.88 to 251.92) | 547.7<br>(499.77 to 618.33)  | 266.26<br>(213.19 to 329.35) |
| <b>Home visit time +25%</b>     |                              |                              |                              |                              |                              |                              |                              |                              |                              |                              |                              |
| SP                              | 441.74<br>(374.73 to 511.24) | 444.47<br>(375.61 to 516.82) | 440.73<br>(372.34 to 513.85) | 472.06<br>(384.11 to 536.43) | 480.88<br>(388.57 to 546.37) | 467.75<br>(379.45 to 533.05) | 508.63<br>(453.47 to 563.11) | 590.1<br>(524.18 to 640.19)  | 256.59<br>(204.75 to 305.95) | 663.13<br>(609.8 to 727.98)  | 281.33<br>(207.21 to 348.39) |
| IP - home visit                 | 571.01<br>(513.31 to 631.69) | 575.93<br>(514.8 to 640.16)  | 572.19<br>(512.16 to 635.6)  | 572.19<br>(512.16 to 635.6)  | 578.76<br>(516.18 to 643.06) | 573.25<br>(512.57 to 636.28) | 600.68<br>(549.6 to 660.64)  | 591.93<br>(566.7 to 616.01)  | 338.81<br>(318.9 to 354.94)  | 681.01<br>(630.75 to 756.63) | 385.32<br>(330.8 to 447.6)   |
| IP - teleconsultation           | 476.27<br>(416.09 to 531.63) | 490.07<br>(422.16 to 552.52) | 483.65<br>(419.7 to 542.68)  | 475.6<br>(413.26 to 540.43)  | 476.8<br>(413.45 to 541.4)   | 481.59<br>(416.46 to 539.34) | 497.67<br>(446.59 to 557.62) | 488.92<br>(463.69 to 513)    | 235.79<br>(215.88 to 251.92) | 556.36<br>(505.06 to 629.65) | 270.26<br>(214.58 to 332.78) |
| <b>Hospital visit time -25%</b> |                              |                              |                              |                              |                              |                              |                              |                              |                              |                              |                              |
| SP                              | 398.32<br>(333.63 to 466.28) | 405.76<br>(336.91 to 478.12) | 402.02<br>(333.63 to 475.15) | 428.16<br>(344.61 to 493.08) | 431.79<br>(345.25 to 494.85) | 423.85<br>(340.45 to 488.53) | 461.94<br>(407.45 to 517.81) | 526.78<br>(466.96 to 571.95) | 237.12<br>(190.58 to 279.04) | 589.8<br>(543.52 to 649.2)   | 265.35<br>(196.23 to 331.83) |
| IP - home visit                 | 503.98 (446 to 564.47)       | 511.26<br>(450.13 to 575.49) | 507.52<br>(447.49 to 570.92) | 507.52<br>(447.49 to 570.92) | 511.49<br>(449.15 to 576.23) | 508.58<br>(447.9 to 571.61)  | 536.01<br>(484.93 to 595.97) | 528.61<br>(504.57 to 551.96) | 312.84<br>(292.93 to 328.97) | 607.69<br>(559.18 to 681.04) | 355.36<br>(302.58 to 417.4)  |

|                                                        | MCADD                        | MSUD                         | IVA                          | GA1                          | PKU                          | HCU                          | CHT                          | SCD - affected               | SCD - carrier                | Cf - affected                | Cf - carrier                 |
|--------------------------------------------------------|------------------------------|------------------------------|------------------------------|------------------------------|------------------------------|------------------------------|------------------------------|------------------------------|------------------------------|------------------------------|------------------------------|
| <b>Basecase</b>                                        |                              |                              |                              |                              |                              |                              |                              |                              |                              |                              |                              |
| IP - teleconsultation                                  | 435.21<br>(374.67 to 491.31) | 451.37<br>(383.46 to 513.81) | 444.94 (381 to 503.98)       | 436.9<br>(374.56 to 501.73)  | 435.5<br>(372.25 to 500.48)  | 440.29<br>(376.94 to 499.21) | 458.96<br>(407.88 to 518.92) | 451.56<br>(427.52 to 474.91) | 235.79<br>(215.88 to 251.92) | 513.33<br>(464.28 to 584.71) | 268.26<br>(213.87 to 331.19) |
| <b>Hospital visit time +25%</b>                        |                              |                              |                              |                              |                              |                              |                              |                              |                              |                              |                              |
| SP                                                     | 475.72<br>(411.04 to 543.69) | 483.17<br>(414.32 to 555.53) | 479.43<br>(411.04 to 552.56) | 505.57<br>(422.02 to 570.49) | 509.19<br>(422.66 to 572.25) | 501.26<br>(417.86 to 565.93) | 539.34<br>(484.85 to 595.21) | 601.49<br>(540.9 to 647.45)  | 237.12<br>(190.58 to 279.04) | 667.21<br>(620.93 to 726.61) | 265.35<br>(196.23 to 331.83) |
| IP - home visit                                        | 581.39<br>(523.41 to 641.87) | 588.67<br>(527.54 to 652.9)  | 584.93<br>(524.9 to 648.33)  | 584.93<br>(524.9 to 648.33)  | 588.9<br>(526.56 to 653.63)  | 585.99<br>(525.3 to 649.01)  | 613.42<br>(562.34 to 673.37) | 603.32<br>(576.94 to 627.99) | 312.84<br>(292.93 to 328.97) | 685.09<br>(636.59 to 758.44) | 355.36<br>(302.58 to 417.4)  |
| IP - teleconsultation                                  | 512.62<br>(452.08 to 568.71) | 528.77<br>(460.86 to 591.22) | 522.35<br>(458.41 to 581.38) | 514.3<br>(451.97 to 579.13)  | 512.9<br>(449.66 to 577.89)  | 517.7<br>(454.35 to 576.61)  | 536.37<br>(485.29 to 596.33) | 526.28<br>(499.89 to 550.94) | 235.79<br>(215.88 to 251.92) | 590.73<br>(541.69 to 662.12) | 268.26<br>(213.87 to 331.19) |
| <b>Not face-to-face external interaction time -25%</b> |                              |                              |                              |                              |                              |                              |                              |                              |                              |                              |                              |
| SP                                                     | 371.19<br>(320.27 to 424.12) | 372.05<br>(320.41 to 426.32) | 369.25<br>(317.96 to 424.09) | 394.05<br>(326.95 to 443.17) | 401.96<br>(331.37 to 451.15) | 390.82<br>(323.48 to 439.93) | 422.17<br>(380.27 to 462.54) | 486.43<br>(435.19 to 525.98) | 197.31<br>(157.14 to 236.41) | 544.71<br>(502.43 to 594.98) | 214.99<br>(158.19 to 265.79) |
| IP - home visit                                        | 474.05<br>(431.13 to 519.3)  | 477.15<br>(431.3 to 525.32)  | 474.34<br>(429.32 to 521.89) | 474.34<br>(429.32 to 521.89) | 479.91<br>(432.89 to 527.68) | 475.13<br>(429.62 to 522.41) | 495.71<br>(457.4 to 540.67)  | 487.8<br>(467.66 to 506.59)  | 260.6<br>(245.66 to 272.7)   | 558.12<br>(519.56 to 616.04) | 296.48<br>(255.04 to 342.96) |
| IP - teleconsultation                                  | 396.5<br>(351.08 to 437.94)  | 406.26<br>(355.32 to 453.09) | 401.44<br>(353.48 to 445.71) | 395.4<br>(348.65 to 444.03)  | 396.95<br>(349.54 to 445.24) | 400.55<br>(351.65 to 443.43) | 411.95<br>(373.65 to 456.92) | 404.05<br>(383.9 to 422.84)  | 176.85<br>(161.91 to 188.94) | 457.05<br>(418.2 to 512.28)  | 203.19<br>(161.05 to 250.19) |
| <b>Not face-to-face external interaction time +25%</b> |                              |                              |                              |                              |                              |                              |                              |                              |                              |                              |                              |
| SP                                                     | 502.85<br>(421.57 to 588.86) | 516.88<br>(430.81 to 607.32) | 512.2<br>(426.72 to 603.61)  | 539.69<br>(439.52 to 620.1)  | 539.02<br>(435.93 to 618.74) | 534.3<br>(434.38 to 614.76)  | 579.11<br>(510.31 to 651.5)  | 641.85<br>(571.63 to 695.16) | 276.92<br>(224.5 to 322.64)  | 712.3<br>(659.18 to 783.53)  | 315.71<br>(233.98 to 399.12) |
| IP - home visit                                        | 611.32<br>(538.56 to 687.34) | 622.78<br>(546.37 to 703.07) | 618.11<br>(543.07 to 697.36) | 618.11<br>(543.07 to 697.36) | 620.47<br>(541.97 to 701.74) | 619.43<br>(543.58 to 698.22) | 653.72<br>(589.87 to 728.66) | 644.13<br>(613.81 to 673.52) | 365.08<br>(340.19 to 385.25) | 734.66<br>(675.81 to 825.17) | 414.24<br>(350.09 to 491.96) |
| IP - teleconsultation                                  | 551.33<br>(475.86 to 621.72) | 573.88 (489 to 651.94)       | 565.86<br>(485.92 to 639.65) | 555.8<br>(477.88 to 636.83)  | 551.45<br>(472.05 to 633.51) | 557.44<br>(479.79 to 632.61) | 583.38<br>(519.53 to 658.32) | 573.79<br>(543.47 to 603.17) | 294.74<br>(269.85 to 314.9)  | 647 (586.8 to 735.78)        | 333.33<br>(266.83 to 411.99) |
| <b>Not face-to-face internal interaction time -25%</b> |                              |                              |                              |                              |                              |                              |                              |                              |                              |                              |                              |
| SP                                                     | 437.02<br>(372.34 to 504.98) | 444.47<br>(375.61 to 516.82) | 440.73<br>(372.34 to 513.85) | 466.87<br>(383.31 to 531.79) | 470.49<br>(383.95 to 533.55) | 462.56<br>(379.15 to 527.23) | 500.64<br>(446.15 to 556.51) | 564.14<br>(504.36 to 609.83) | 237.12<br>(190.58 to 279.04) | 628.51<br>(582.22 to 687.9)  | 265.35<br>(196.23 to 331.83) |

|                                                        | MCADD                        | MSUD                         | IVA                          | GA1                          | PKU                          | HCU                          | CHT                          | SCD - affected               | SCD - carrier                | Cf - affected                | Cf - carrier                 |
|--------------------------------------------------------|------------------------------|------------------------------|------------------------------|------------------------------|------------------------------|------------------------------|------------------------------|------------------------------|------------------------------|------------------------------|------------------------------|
| <b>Basecase</b>                                        |                              |                              |                              |                              |                              |                              |                              |                              |                              |                              |                              |
| IP - home visit                                        | 542.68<br>(484.71 to 603.17) | 549.97<br>(488.83 to 614.19) | 546.23<br>(486.19 to 609.63) | 546.23<br>(486.19 to 609.63) | 550.19<br>(487.85 to 614.93) | 547.28<br>(486.6 to 610.31)  | 574.71<br>(523.64 to 634.67) | 565.97<br>(540.73 to 590.04) | 312.84<br>(292.93 to 328.97) | 646.39<br>(597.88 to 719.74) | 355.36<br>(302.58 to 417.4)  |
| IP - teleconsultation                                  | 473.91<br>(413.37 to 530.01) | 490.07<br>(422.16 to 552.52) | 483.65<br>(419.7 to 542.68)  | 475.6<br>(413.26 to 540.43)  | 474.2<br>(410.95 to 539.18)  | 479 (415.65 to 537.91)       | 497.67<br>(446.59 to 557.62) | 488.92<br>(463.69 to 513)    | 235.79<br>(215.88 to 251.92) | 552.03<br>(502.98 to 623.42) | 268.26<br>(213.87 to 331.19) |
| <b>Not face-to-face internal interaction time +25%</b> |                              |                              |                              |                              |                              |                              |                              |                              |                              |                              |                              |
| SP                                                     | 437.02<br>(372.34 to 504.98) | 444.47<br>(375.61 to 516.82) | 440.73<br>(372.34 to 513.85) | 466.87<br>(383.31 to 531.79) | 470.49<br>(383.95 to 533.55) | 462.56<br>(379.15 to 527.23) | 500.64<br>(446.15 to 556.51) | 564.14<br>(504.36 to 609.83) | 237.12<br>(190.58 to 279.04) | 628.51<br>(582.22 to 687.9)  | 265.35<br>(196.23 to 331.83) |
| IP - home visit                                        | 542.68<br>(484.71 to 603.17) | 549.97<br>(488.83 to 614.19) | 546.23<br>(486.19 to 609.63) | 546.23<br>(486.19 to 609.63) | 550.19<br>(487.85 to 614.93) | 547.28<br>(486.6 to 610.31)  | 574.71<br>(523.64 to 634.67) | 565.97<br>(540.73 to 590.04) | 312.84<br>(292.93 to 328.97) | 646.39<br>(597.88 to 719.74) | 355.36<br>(302.58 to 417.4)  |
| IP - teleconsultation                                  | 473.91<br>(413.37 to 530.01) | 490.07<br>(422.16 to 552.52) | 483.65<br>(419.7 to 542.68)  | 475.6<br>(413.26 to 540.43)  | 474.2<br>(410.95 to 539.18)  | 479 (415.65 to 537.91)       | 497.67<br>(446.59 to 557.62) | 488.92<br>(463.69 to 513)    | 235.79<br>(215.88 to 251.92) | 552.03<br>(502.98 to 623.42) | 268.26<br>(213.87 to 331.19) |
